# Supplementary material for: Artificial hard-substrate colonisation in the offshore Hywind Scotland Pilot Park
Source: Copernicus journal article supplement (doi:10.5194/wes-7-801-2022), 2022-04-04
Supplement: Supplementary file 1 [file wes-7-801-2022-supplement.zip]

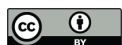

*Supplement of*

## **Artificial hard-substrate colonisation in the offshore Hywind Scotland Pilot Park**

**Rikard Karlsson et al.**

*Correspondence to:* Rikard Karlsson ([rikard.karlsson@mmt.se](mailto:rikard.karlsson@mmt.se)) and Iris Duranović ([iris.duranovic@mmt.se](mailto:iris.duranovic@mmt.se))

- [wes-7-801-2022-supplement-title-page.pdf](#)
- [Supplementary Table.pdf](#)

The copyright of individual parts of the supplement might differ from the article licence.
