# Supplementary material for: Artificial hard-substrate colonisation in the offshore Hywind Scotland Pilot Park
Source: Copernicus journal article supplement (doi:10.5194/wes-7-801-2022), 2022-04-04
Supplement: Supplementary file 2 [file wes-7-801-2022-supplement.zip]

**Supplementary table S1.** List with identified taxa, structure, and quantity.

| STRUCTURE             | PHYLUM        | TAXA                            | QUANTITY/ PRESENCE (P) | COMMENTS                                                             |
|-----------------------|---------------|---------------------------------|------------------------|----------------------------------------------------------------------|
| Concrete Mattress     | Annelida      | <i>Sabellaria spinulosa</i>     | P                      |                                                                      |
| Concrete Mattress     | Arthropoda    | <i>Cancer pagurus</i>           | 2                      |                                                                      |
| Concrete Mattress     | Arthropoda    | Galatheoidea                    | 2                      |                                                                      |
| Concrete Mattress     | Arthropoda    | <i>Homarus sp.</i>              | P                      |                                                                      |
| Concrete Mattress     | Arthropoda    | <i>Lithodes maja</i>            | 1                      |                                                                      |
| Concrete Mattress     | Arthropoda    | <i>Munida sp.</i>               | 11                     |                                                                      |
| Concrete Mattress     | Arthropoda    | Paguridae                       | 17                     |                                                                      |
| Concrete Mattress     | Arthropoda    | Palaemonidae                    | 5                      |                                                                      |
| Concrete Mattress     | Bryozoa       | <i>Alcyonidium sp.</i>          | P                      |                                                                      |
| Concrete Mattress     | Chordata      | Gadidae                         | P                      |                                                                      |
| Concrete Mattress     | Chordata      | <i>Molva molva</i>              | P                      |                                                                      |
| Concrete Mattress     | Chordata      | <i>Scophthalmus maximus</i>     | P                      |                                                                      |
| Concrete Mattress     | Cnidaria      | Actiniaria                      | P                      |                                                                      |
| Concrete Mattress     | Cnidaria      | <i>Ectopleura larynx</i>        | P                      |                                                                      |
| Concrete Mattress     | Cnidaria      | Nemertesia                      | P                      |                                                                      |
| Concrete Mattress     | Cnidaria      | <i>Tubularia indivisa</i>       | P                      |                                                                      |
| Concrete Mattress     | Cnidaria      | Urticina sp.                    | P                      |                                                                      |
| Concrete Mattress     | Echinodermata | Asteroidea                      | 2                      |                                                                      |
| Infield Cable HS1-HS4 | Annelida      | <i>Sabella sp.</i>              | P                      |                                                                      |
| Infield Cable HS1-HS4 | Annelida      | <i>Sabellaria spinulosa</i>     | P                      |                                                                      |
| Infield Cable HS1-HS4 | Annelida      | <i>Spirobranchus sp.</i>        | P                      |                                                                      |
| Infield Cable HS1-HS4 | Arthropoda    | Balanoidea                      | P                      |                                                                      |
| Infield Cable HS1-HS4 | Arthropoda    | <i>Cancer pagurus</i>           | 12                     |                                                                      |
| Infield Cable HS1-HS4 | Arthropoda    | Caprellidae                     | P                      |                                                                      |
| Infield Cable HS1-HS4 | Arthropoda    | Galatheoidea                    | 17                     |                                                                      |
| Infield Cable HS1-HS4 | Arthropoda    | <i>Hyas sp.</i>                 | 8                      |                                                                      |
| Infield Cable HS1-HS4 | Arthropoda    | Inachidae                       | 2                      |                                                                      |
| Infield Cable HS1-HS4 | Arthropoda    | <i>Lithodes maja</i>            | 5                      |                                                                      |
| Infield Cable HS1-HS4 | Arthropoda    | <i>Munida sp.</i>               | 4                      |                                                                      |
| Infield Cable HS1-HS4 | Arthropoda    | Paguroidea                      | 10                     |                                                                      |
| Infield Cable HS1-HS4 | Arthropoda    | Palaemonidae                    | 88                     | Potentially underestimated                                           |
| Infield Cable HS1-HS4 | Bryozoa       | <i>Alcyonidium sp.</i>          | P                      |                                                                      |
| Infield Cable HS1-HS4 | Bryozoa       | Bryozoa                         | P                      |                                                                      |
| Infield Cable HS1-HS4 | Bryozoa       | <i>Flustra foliacea</i>         | P                      |                                                                      |
| Infield Cable HS1-HS4 | Chordata      | Ammodytidae                     | P                      |                                                                      |
| Infield Cable HS1-HS4 | Chordata      | <i>Ascidia mentula</i>          | P                      |                                                                      |
| Infield Cable HS1-HS4 | Chordata      | <i>Corella parallelogramma</i>  | P                      |                                                                      |
| Infield Cable HS1-HS4 | Chordata      | Gadidae                         | P                      |                                                                      |
| Infield Cable HS1-HS4 | Chordata      | <i>Gadus morhua</i>             | P                      |                                                                      |
| Infield Cable HS1-HS4 | Chordata      | <i>Lophius sp.</i>              | P                      |                                                                      |
| Infield Cable HS1-HS4 | Chordata      | <i>Melanogrammus aeglefinus</i> | P                      |                                                                      |
| Infield Cable HS1-HS4 | Chordata      | <i>Merlangius merlangus</i>     | P                      |                                                                      |
| Infield Cable HS1-HS4 | Chordata      | Pleuronectiformes               | P                      |                                                                      |
| Infield Cable HS1-HS4 | Chordata      | Triglidae                       | P                      |                                                                      |
| Infield Cable HS1-HS4 | Chordata      | <i>Trisopterus luscus</i>       | P                      |                                                                      |
| Infield Cable HS1-HS4 | Chordata      | Tunicata                        | P                      |                                                                      |
| Infield Cable HS1-HS4 | Cnidaria      | <i>Alcyonium digitatum</i>      | P                      |                                                                      |
| Infield Cable HS1-HS4 | Cnidaria      | <i>Desmophyllum pertusum</i>    | P                      | 3 Colonies                                                           |
| Infield Cable HS1-HS4 | Cnidaria      | <i>Ectopleura larynx</i>        | P                      |                                                                      |
| Infield Cable HS1-HS4 | Cnidaria      | Hydrozoa                        | P                      |                                                                      |
| Infield Cable HS1-HS4 | Cnidaria      | <i>Kirchenpaueria sp.</i>       | P                      |                                                                      |
| Infield Cable HS1-HS4 | Cnidaria      | <i>Metridium senile</i>         | P                      |                                                                      |
| Infield Cable HS1-HS4 | Cnidaria      | <i>Nemertesia sp.</i>           | P                      |                                                                      |
| Infield Cable HS1-HS4 | Cnidaria      | <i>Sagartia sp.</i>             | P                      |                                                                      |
| Infield Cable HS1-HS4 | Cnidaria      | <i>Tubularia sp.</i>            | P                      |                                                                      |
| Infield Cable HS1-HS4 | Cnidaria      | <i>Urticina sp.</i>             | P                      |                                                                      |
| Infield Cable HS1-HS4 | Cnidaria      | <i>Virgularia sp.</i>           | P                      |                                                                      |
| Infield Cable HS1-HS4 | Echinodermata | <i>Asterias rubens</i>          | 161                    |                                                                      |
| Infield Cable HS1-HS4 | Echinodermata | Asteroidea                      | 125                    |                                                                      |
| Infield Cable HS1-HS4 | Echinodermata | <i>Astropecten irregularis</i>  | P                      |                                                                      |
| Infield Cable HS1-HS4 | Echinodermata | <i>Ecinus sp.</i>               | 7                      |                                                                      |
| Infield Cable HS1-HS4 | Echinodermata | <i>Henricia sp.</i>             | P                      |                                                                      |
| Infield Cable HS1-HS4 | Echinodermata | <i>Luidia sp.</i>               | P                      |                                                                      |
| Infield Cable HS1-HS4 | Echinodermata | <i>Luidia sarsii</i>            | P                      |                                                                      |
| Infield Cable HS1-HS4 | Echinodermata | <i>Ophiura sp.</i>              | P                      |                                                                      |
| Infield Cable HS1-HS4 | Mollusca      | Gastropoda                      | P                      |                                                                      |
| Infield Cable HS1-HS4 | Mollusca      | <i>Loligo vulgaris</i>          | P                      |                                                                      |
| Infield Cable HS1-HS4 | Mollusca      | Nudibranchia                    | 6                      |                                                                      |
| Infield Cable HS1-HS4 | Mollusca      | Sepioidea                       | P                      |                                                                      |
| Infield Cable HS2-HS3 | Annelida      | <i>Sabella sp.</i>              | P                      | Excluded from priority structures post survey. Thus, no enumeration. |
| Infield Cable HS2-HS3 | Annelida      | <i>Sabellaria spinulosa</i>     | P                      | Excluded from priority structures post survey. Thus, no enumeration. |
| Infield Cable HS2-HS3 | Annelida      | <i>Spirobranchus sp.</i>        | P                      | Excluded from priority structures post survey. Thus, no enumeration. |
| Infield Cable HS2-HS3 | Arthropoda    | Balanoidea                      | P                      | Excluded from priority structures post survey. Thus, no enumeration. |
| Infield Cable HS2-HS3 | Arthropoda    | <i>Cancer pagurus</i>           | P                      | Excluded from priority structures post survey. Thus, no enumeration. |
| Infield Cable HS2-HS3 | Arthropoda    | Galatheoidea                    | P                      | Excluded from priority structures post survey. Thus, no enumeration. |
| Infield Cable HS2-HS3 | Arthropoda    | Paguridae                       | P                      | Excluded from priority structures post survey. Thus, no enumeration. |
| Infield Cable HS2-HS3 | Arthropoda    | <i>Pagurus prideaux</i>         | P                      | Excluded from priority structures post survey. Thus, no enumeration. |
| Infield Cable HS2-HS3 | Bryozoa       | Bryozoa                         | P                      | Excluded from priority structures post survey. Thus, no enumeration. |
| Infield Cable HS2-HS3 | Bryozoa       | <i>Flustra foliacea</i>         | P                      | Excluded from priority structures post survey. Thus, no enumeration. |

[illegible][illegible]

Supplementary table S1. List with identified taxa, structure, and quantity.

| STRUCTURE              | PHYLUM        | TAXA                            | QUANTITY/ PRESENCE (P) | COMMENTS                                                                                                                    |
|------------------------|---------------|---------------------------------|------------------------|-----------------------------------------------------------------------------------------------------------------------------|
| Infield Cable HS4-HS5  | Annelida      | <i>Sabellaria spinulosa</i>     | P                      | All but component "HS05-QA01 Bellmouth to Burial" were excluded from priority structures post survey. Thus, no enumeration. |
| Infield Cable HS4-HS5  | Annelida      | <i>Spirobranchus sp.</i>        | P                      | All but component "HS05-QA01 Bellmouth to Burial" were excluded from priority structures post survey. Thus, no enumeration. |
| Infield Cable HS4-HS5  | Arthropoda    | Balanoidea                      | P                      | All but component "HS05-QA01 Bellmouth to Burial" were excluded from priority structures post survey. Thus, no enumeration. |
| Infield Cable HS4-HS5  | Arthropoda    | Brachyura                       | P                      | All but component "HS05-QA01 Bellmouth to Burial" were excluded from priority structures post survey. Thus, no enumeration. |
| Infield Cable HS4-HS5  | Arthropoda    | <i>Cancer pagurus</i>           | P                      | All but component "HS05-QA01 Bellmouth to Burial" were excluded from priority structures post survey. Thus, no enumeration. |
| Infield Cable HS4-HS5  | Arthropoda    | Galatheaidea                    | P                      | All but component "HS05-QA01 Bellmouth to Burial" were excluded from priority structures post survey. Thus, no enumeration. |
| Infield Cable HS4-HS5  | Arthropoda    | Inachidae                       | P                      | All but component "HS05-QA01 Bellmouth to Burial" were excluded from priority structures post survey. Thus, no enumeration. |
| Infield Cable HS4-HS5  | Arthropoda    | <i>Munida sp.</i>               | 3                      | All but component "HS05-QA01 Bellmouth to Burial" were excluded from priority structures post survey. Thus, no enumeration. |
| Infield Cable HS4-HS5  | Arthropoda    | Paguridae                       | 32                     | All but component "HS05-QA01 Bellmouth to Burial" were excluded from priority structures post survey. Thus, no enumeration. |
| Infield Cable HS4-HS5  | Bryozoa       | <i>Alcyonium sp.</i>            | P                      | All but component "HS05-QA01 Bellmouth to Burial" were excluded from priority structures post survey. Thus, no enumeration. |
| Infield Cable HS4-HS5  | Chordata      | Gadidae                         | P                      | All but component "HS05-QA01 Bellmouth to Burial" were excluded from priority structures post survey. Thus, no enumeration. |
| Infield Cable HS4-HS5  | Chordata      | <i>Gadus morhua</i>             | P                      | All but component "HS05-QA01 Bellmouth to Burial" were excluded from priority structures post survey. Thus, no enumeration. |
| Infield Cable HS4-HS5  | Chordata      | <i>Melanogrammus aeglefinus</i> | P                      | All but component "HS05-QA01 Bellmouth to Burial" were excluded from priority structures post survey. Thus, no enumeration. |
| Infield Cable HS4-HS5  | Chordata      | <i>Pholis gunnellus</i>         | P                      | All but component "HS05-QA01 Bellmouth to Burial" were excluded from priority structures post survey. Thus, no enumeration. |
| Infield Cable HS4-HS5  | Chordata      | <i>Pleuronectes platessa</i>    | P                      | All but component "HS05-QA01 Bellmouth to Burial" were excluded from priority structures post survey. Thus, no enumeration. |
| Infield Cable HS4-HS5  | Chordata      | Pleuronectiformes               | P                      | All but component "HS05-QA01 Bellmouth to Burial" were excluded from priority structures post survey. Thus, no enumeration. |
| Infield Cable HS4-HS5  | Chordata      | Rajiformes                      | P                      | All but component "HS05-QA01 Bellmouth to Burial" were excluded from priority structures post survey. Thus, no enumeration. |
| Infield Cable HS4-HS5  | Chordata      | Scorpaeniformes                 | P                      | All but component "HS05-QA01 Bellmouth to Burial" were excluded from priority structures post survey. Thus, no enumeration. |
| Infield Cable HS4-HS5  | Chordata      | Triglidae                       | P                      | All but component "HS05-QA01 Bellmouth to Burial" were excluded from priority structures post survey. Thus, no enumeration. |
| Infield Cable HS4-HS5  | Chordata      | <i>Trisopterus luscus</i>       | P                      | All but component "HS05-QA01 Bellmouth to Burial" were excluded from priority structures post survey. Thus, no enumeration. |
| Infield Cable HS4-HS5  | Cnidaria      | Actiniaria                      | P                      | All but component "HS05-QA01 Bellmouth to Burial" were excluded from priority structures post survey. Thus, no enumeration. |
| Infield Cable HS4-HS5  | Cnidaria      | <i>Alcyonium digitatum</i>      | P                      | All but component "HS05-QA01 Bellmouth to Burial" were excluded from priority structures post survey. Thus, no enumeration. |
| Infield Cable HS4-HS5  | Cnidaria      | <i>Ectopleura larynx</i>        | P                      | All but component "HS05-QA01 Bellmouth to Burial" were excluded from priority structures post survey. Thus, no enumeration. |
| Infield Cable HS4-HS5  | Cnidaria      | Hydrozoa                        | P                      | All but component "HS05-QA01 Bellmouth to Burial" were excluded from priority structures post survey. Thus, no enumeration. |
| Infield Cable HS4-HS5  | Cnidaria      | <i>Kirchenpaueria sp.</i>       | P                      | All but component "HS05-QA01 Bellmouth to Burial" were excluded from priority structures post survey. Thus, no enumeration. |
| Infield Cable HS4-HS5  | Cnidaria      | <i>Metridium senile</i>         | P                      | All but component "HS05-QA01 Bellmouth to Burial" were excluded from priority structures post survey. Thus, no enumeration. |
| Infield Cable HS4-HS5  | Cnidaria      | <i>Nemertesia sp.</i>           | P                      | All but component "HS05-QA01 Bellmouth to Burial" were excluded from priority structures post survey. Thus, no enumeration. |
| Infield Cable HS4-HS5  | Cnidaria      | <i>Tubularia sp.</i>            | P                      | All but component "HS05-QA01 Bellmouth to Burial" were excluded from priority structures post survey. Thus, no enumeration. |
| Infield Cable HS4-HS5  | Cnidaria      | <i>Tubularia indivisa</i>       | P                      | All but component "HS05-QA01 Bellmouth to Burial" were excluded from priority structures post survey. Thus, no enumeration. |
| Infield Cable HS4-HS5  | Cnidaria      | <i>Urticina sp.</i>             | P                      | All but component "HS05-QA01 Bellmouth to Burial" were excluded from priority structures post survey. Thus, no enumeration. |
| Infield Cable HS4-HS5  | Cnidaria      | <i>Virgularia sp.</i>           | P                      | All but component "HS05-QA01 Bellmouth to Burial" were excluded from priority structures post survey. Thus, no enumeration. |
| Infield Cable HS4-HS5  | Echinodermata | <i>Asterias rubens</i>          | 133                    | All but component "HS05-QA01 Bellmouth to Burial" were excluded from priority structures post survey. Thus, no enumeration. |
| Infield Cable HS4-HS5  | Echinodermata | Asteroidea                      | P                      | All but component "HS05-QA01 Bellmouth to Burial" were excluded from priority structures post survey. Thus, no enumeration. |
| Infield Cable HS4-HS5  | Echinodermata | <i>Astropecten irregularis</i>  | P                      | All but component "HS05-QA01 Bellmouth to Burial" were excluded from priority structures post survey. Thus, no enumeration. |
| Infield Cable HS4-HS5  | Echinodermata | Echinidea                       | P                      | All but component "HS05-QA01 Bellmouth to Burial" were excluded from priority structures post survey. Thus, no enumeration. |
| Infield Cable HS4-HS5  | Echinodermata | <i>Echinus sp.</i>              | 7                      | All but component "HS05-QA01 Bellmouth to Burial" were excluded from priority structures post survey. Thus, no enumeration. |
| Infield Cable HS4-HS5  | Echinodermata | <i>Henricia sp.</i>             | P                      | All but component "HS05-QA01 Bellmouth to Burial" were excluded from priority structures post survey. Thus, no enumeration. |
| Infield Cable HS4-HS5  | Echinodermata | <i>Hippasteria phrygiana</i>    | P                      | All but component "HS05-QA01 Bellmouth to Burial" were excluded from priority structures post survey. Thus, no enumeration. |
| Infield Cable HS4-HS5  | Echinodermata | <i>Luidia ciliaris</i>          | P                      | All but component "HS05-QA01 Bellmouth to Burial" were excluded from priority structures post survey. Thus, no enumeration. |
| Infield Cable HS4-HS5  | Echinodermata | <i>Luidia sarsii</i>            | P                      | All but component "HS05-QA01 Bellmouth to Burial" were excluded from priority structures post survey. Thus, no enumeration. |
| Infield Cable HS4-HS5  | Echinodermata | <i>Ophiura ophiura</i>          | P                      | All but component "HS05-QA01 Bellmouth to Burial" were excluded from priority structures post survey. Thus, no enumeration. |
| Infield Cable HS4-HS5  | Mollusca      | Cephalopoda eggs                | P                      | All but component "HS05-QA01 Bellmouth to Burial" were excluded from priority structures post survey. Thus, no enumeration. |
| Infield Cable HS4-HS5  | Mollusca      | Nudibranch eggs                 | P                      | All but component "HS05-QA01 Bellmouth to Burial" were excluded from priority structures post survey. Thus, no enumeration. |
| Mooring Anchors SA-111 | Annelida      | <i>Sabella sp.</i>              | P                      |                                                                                                                             |
| Mooring Anchors SA-111 | Annelida      | <i>Spirobranchus sp.</i>        | P                      |                                                                                                                             |
| Mooring Anchors SA-111 | Arthropoda    | Balanoidea                      | P                      |                                                                                                                             |
| Mooring Anchors SA-111 | Arthropoda    | <i>Cancer pagurus</i>           | 1                      |                                                                                                                             |
| Mooring Anchors SA-111 | Arthropoda    | Galatheaidea                    | 2                      |                                                                                                                             |
| Mooring Anchors SA-111 | Arthropoda    | <i>Lithodes maja</i>            | 2                      |                                                                                                                             |
| Mooring Anchors SA-111 | Arthropoda    | Paguridae                       | 2                      |                                                                                                                             |
| Mooring Anchors SA-111 | Arthropoda    | Palaemonidae                    | P                      |                                                                                                                             |
| Mooring Anchors SA-111 | Bryozoa       | Bryozoa                         | P                      |                                                                                                                             |
| Mooring Anchors SA-111 | Chordata      | <i>Melanogrammus aeglefinus</i> | P                      |                                                                                                                             |

**Supplementary table S1.** List with identified taxa, structure, and quantity.

| STRUCTURE              | PHYLUM     | TAXA                            | QUANTITY/ PRESENCE (P) | COMMENTS |
|------------------------|------------|---------------------------------|------------------------|----------|
| Mooring Anchors SA-111 | Cnidaria   | <i>Alcyonium digitatum</i>      | P                      |          |
| Mooring Anchors SA-111 | Cnidaria   | Hydrozoa                        | P                      |          |
| Mooring Anchors SA-111 | Cnidaria   | <i>Metridium senile</i>         | P                      |          |
| Mooring Anchors SA-111 | Cnidaria   | <i>Nemertesia ramosa</i>        | P                      |          |
| Mooring Anchors SA-111 | Cnidaria   | <i>Tubularia</i> sp.            | P                      |          |
| Mooring Anchors SA-111 | Cnidaria   | <i>Urticina</i> sp.             | P                      |          |
| Mooring Anchors SA-111 | Mollusca   | Cephalopoda eggs                | P                      |          |
| Mooring Anchors SA-111 | Porifera   | Porifera                        | P                      |          |
| Mooring Anchors SA-112 | Annelida   | <i>Sabella</i> sp.              | P                      |          |
| Mooring Anchors SA-112 | Annelida   | <i>Spirobranchus</i> sp.        | P                      |          |
| Mooring Anchors SA-112 | Arthropoda | Balanoidea                      | P                      |          |
| Mooring Anchors SA-112 | Arthropoda | <i>Cancer pagurus</i>           | 1                      |          |
| Mooring Anchors SA-112 | Arthropoda | Inachidae                       | 1                      |          |
| Mooring Anchors SA-112 | Arthropoda | <i>Lithodes maja</i>            | 9                      |          |
| Mooring Anchors SA-112 | Arthropoda | Paguridae                       | 21                     |          |
| Mooring Anchors SA-112 | Arthropoda | <i>Pagurus prideaux</i>         | 1                      |          |
| Mooring Anchors SA-112 | Chordata   | Gadidae                         | P                      |          |
| Mooring Anchors SA-112 | Chordata   | <i>Melanogrammus aeglefinus</i> | P                      |          |
| Mooring Anchors SA-112 | Chordata   | <i>Merlangius merlangus</i>     | P                      |          |
| Mooring Anchors SA-112 | Chordata   | <i>Molva molva</i>              | P                      |          |
| Mooring Anchors SA-112 | Chordata   | <i>Trisopterus</i> sp.          | P                      |          |
| Mooring Anchors SA-112 | Chordata   | <i>Trisopterus luscus</i>       | P                      |          |
| Mooring Anchors SA-112 | Chordata   | <i>Trisopterus minutus</i>      | P                      |          |
| Mooring Anchors SA-112 | Cnidaria   | <i>Adamsia</i> sp.              | P                      |          |
| Mooring Anchors SA-112 | Cnidaria   | <i>Alcyonium digitatum</i>      | P                      |          |
| Mooring Anchors SA-112 | Cnidaria   | Hydrozoa                        | P                      |          |
| Mooring Anchors SA-112 | Cnidaria   | <i>Nemertesia ramosa</i>        | P                      |          |
| Mooring Anchors SA-112 | Cnidaria   | <i>Tubularia</i> sp.            | P                      |          |
| Mooring Anchors SA-112 | Mollusca   | Cephalopoda eggs                | P                      |          |
| Mooring Anchors SA-112 | Mollusca   | <i>Loligo vulgaris</i>          | P                      |          |
| Mooring Anchors SA-113 | Annelida   | <i>Sabella</i> sp.              | P                      |          |
| Mooring Anchors SA-113 | Annelida   | <i>Sabellaria spinulosa</i>     | P                      |          |
| Mooring Anchors SA-113 | Annelida   | <i>Spirobranchus</i> sp.        | P                      |          |
| Mooring Anchors SA-113 | Arthropoda | Balanoidea                      | P                      |          |
| Mooring Anchors SA-113 | Arthropoda | <i>Lithodes maja</i>            | 9                      |          |
| Mooring Anchors SA-113 | Arthropoda | Paguridae                       | 12                     |          |
| Mooring Anchors SA-113 | Arthropoda | Palaemonidae                    | 1                      |          |
| Mooring Anchors SA-113 | Chordata   | Gadidae                         | P                      |          |
| Mooring Anchors SA-113 | Chordata   | Pleuronectiformes               | P                      |          |
| Mooring Anchors SA-113 | Chordata   | <i>Trisopterus</i> sp.          | P                      |          |
| Mooring Anchors SA-113 | Chordata   | <i>Trisopterus luscus</i>       | P                      |          |
| Mooring Anchors SA-113 | Cnidaria   | <i>Alcyonium digitatum</i>      | P                      |          |
| Mooring Anchors SA-113 | Cnidaria   | Hydrozoa                        | P                      |          |
| Mooring Anchors SA-113 | Cnidaria   | <i>Kirchenpaueria</i> sp.       | P                      |          |
| Mooring Anchors SA-113 | Cnidaria   | <i>Metridium senile</i>         | P                      |          |
| Mooring Anchors SA-113 | Cnidaria   | <i>Nemertesia ramosa</i>        | P                      |          |
| Mooring Anchors SA-113 | Cnidaria   | <i>Tubularia</i> sp.            | P                      |          |
| Mooring Anchors SA-113 | Mollusca   | <i>Buccinum</i> eggs            | P                      |          |
| Mooring Anchors SA-113 | Mollusca   | Cephalopoda eggs                | P                      |          |
| Mooring Anchors SA-113 | Porifera   | Porifera                        | P                      |          |
| Mooring Anchors SA-121 | Arthropoda | <i>Cancer pagurus</i>           | 1                      |          |
| Mooring Anchors SA-121 | Arthropoda | <i>Lithodes maja</i>            | 2                      |          |
| Mooring Anchors SA-121 | Arthropoda | Paguridae                       | P                      |          |
| Mooring Anchors SA-121 | Arthropoda | Palaemonidae                    | 3                      |          |
| Mooring Anchors SA-121 | Chordata   | <i>Trisopterus luscus</i>       | P                      |          |
| Mooring Anchors SA-121 | Cnidaria   | <i>Alcyonium digitatum</i>      | P                      |          |
| Mooring Anchors SA-121 | Cnidaria   | Hydrozoa                        | P                      |          |
| Mooring Anchors SA-121 | Cnidaria   | <i>Nemertesia ramosa</i>        | P                      |          |
| Mooring Anchors SA-121 | Cnidaria   | <i>Tubularia</i> sp.            | P                      |          |
| Mooring Anchors SA-121 | Cnidaria   | <i>Tubularia indivisa</i>       | P                      |          |
| Mooring Anchors SA-121 | Cnidaria   | <i>Urticina</i> sp.             | P                      |          |
| Mooring Anchors SA-121 | Mollusca   | Cephalopoda eggs                | P                      |          |
| Mooring Anchors SA-122 | Annelida   | <i>Spirobranchus</i> sp.        | P                      |          |
| Mooring Anchors SA-122 | Arthropoda | Balanoidea                      | P                      |          |
| Mooring Anchors SA-122 | Arthropoda | Brachyura                       | 1                      |          |
| Mooring Anchors SA-122 | Arthropoda | <i>Cancer pagurus</i>           | 5                      |          |
| Mooring Anchors SA-122 | Arthropoda | <i>Lithodes maja</i>            | 2                      |          |
| Mooring Anchors SA-122 | Arthropoda | Paguridae                       | P                      |          |
| Mooring Anchors SA-122 | Arthropoda | Palaemonidae                    | 1                      |          |
| Mooring Anchors SA-122 | Chordata   | <i>Gadus morhua</i>             | P                      |          |
| Mooring Anchors SA-122 | Chordata   | Pleuronectiformes               | P                      |          |
| Mooring Anchors SA-122 | Chordata   | <i>Trisopterus luscus</i>       | P                      |          |
| Mooring Anchors SA-122 | Cnidaria   | <i>Alcyonium digitatum</i>      | P                      |          |
| Mooring Anchors SA-122 | Cnidaria   | <i>Ectopleura larynx</i>        | P                      |          |
| Mooring Anchors SA-122 | Cnidaria   | <i>Metridium senile</i>         | P                      |          |
| Mooring Anchors SA-122 | Cnidaria   | <i>Nemertesia ramosa</i>        | P                      |          |
| Mooring Anchors SA-122 | Cnidaria   | <i>Tubularia</i> sp.            | P                      |          |
| Mooring Anchors SA-122 | Cnidaria   | <i>Tubularia indivisa</i>       | P                      |          |
| Mooring Anchors SA-122 | Cnidaria   | <i>Urticina</i> sp.             | P                      |          |

**Supplementary table S1.** List with identified taxa, structure, and quantity.

| STRUCTURE              | PHYLUM        | TAXA                            | QUANTITY/ PRESENCE (P) | COMMENTS |
|------------------------|---------------|---------------------------------|------------------------|----------|
| Mooring Anchors SA-122 | Mollusca      | <i>Buccinum</i> eggs            | P                      |          |
| Mooring Anchors SA-122 | Mollusca      | Cephalopoda eggs                | P                      |          |
| Mooring Anchors SA-123 | Annelida      | <i>Sabella</i> sp.              | P                      |          |
| Mooring Anchors SA-123 | Arthropoda    | Balanioidea                     | P                      |          |
| Mooring Anchors SA-123 | Arthropoda    | <i>Cancer pagurus</i>           | P                      |          |
| Mooring Anchors SA-123 | Arthropoda    | Galatheaidea                    | P                      |          |
| Mooring Anchors SA-123 | Arthropoda    | <i>Lithodes maja</i>            | 6                      |          |
| Mooring Anchors SA-123 | Arthropoda    | Paguridae                       | 5                      |          |
| Mooring Anchors SA-123 | Bryozoa       | Bryozoa                         | P                      |          |
| Mooring Anchors SA-123 | Chordata      | <i>Melanogrammus aeglefinus</i> | P                      |          |
| Mooring Anchors SA-123 | Chordata      | <i>Molva molva</i>              | P                      |          |
| Mooring Anchors SA-123 | Chordata      | Pleuronectiformes               | P                      |          |
| Mooring Anchors SA-123 | Cnidaria      | <i>Alcyonium digitatum</i>      | P                      |          |
| Mooring Anchors SA-123 | Cnidaria      | Hydrozoa                        | P                      |          |
| Mooring Anchors SA-123 | Cnidaria      | <i>Metridium senile</i>         | P                      |          |
| Mooring Anchors SA-123 | Cnidaria      | <i>Nemertesia ramosa</i>        | P                      |          |
| Mooring Anchors SA-123 | Cnidaria      | <i>Tubularia</i> sp.            | P                      |          |
| Mooring Anchors SA-123 | Cnidaria      | <i>Urticina</i> sp.             | P                      |          |
| Mooring Anchors SA-123 | Echinodermata | <i>Luidia</i> sp.               | P                      |          |
| Mooring Anchors SA-123 | Mollusca      | Cephalopoda eggs                | P                      |          |
| Mooring Anchors SA-123 | Mollusca      | Scaphopoda                      | P                      |          |
| Mooring Anchors SA-123 | Porifera      | Porifera                        | P                      |          |
| Mooring Anchors SA-131 | Annelida      | <i>Sabella</i> sp.              | P                      |          |
| Mooring Anchors SA-131 | Annelida      | <i>Sabellaria spinulosa</i>     | P                      |          |
| Mooring Anchors SA-131 | Annelida      | <i>Serpula</i> sp.              | P                      |          |
| Mooring Anchors SA-131 | Annelida      | <i>Spirobranchus</i> sp.        | P                      |          |
| Mooring Anchors SA-131 | Arthropoda    | Balanioidea                     | P                      |          |
| Mooring Anchors SA-131 | Arthropoda    | Brachyura                       | P                      |          |
| Mooring Anchors SA-131 | Arthropoda    | <i>Cancer pagurus</i>           | 2                      |          |
| Mooring Anchors SA-131 | Arthropoda    | Galatheaidea                    | 1                      |          |
| Mooring Anchors SA-131 | Arthropoda    | <i>Lithodes maja</i>            | 2                      |          |
| Mooring Anchors SA-131 | Arthropoda    | <i>Munida</i> sp.               | 11                     |          |
| Mooring Anchors SA-131 | Arthropoda    | Paguridae                       | 84                     |          |
| Mooring Anchors SA-131 | Arthropoda    | Palaemonidae                    | 1                      |          |
| Mooring Anchors SA-131 | Bryozoa       | Bryozoa                         | P                      |          |
| Mooring Anchors SA-131 | Chordata      | Gadidae                         | P                      |          |
| Mooring Anchors SA-131 | Chordata      | <i>Merlangius merlangus</i>     | P                      |          |
| Mooring Anchors SA-131 | Chordata      | <i>Pholis gunnellus</i>         | P                      |          |
| Mooring Anchors SA-131 | Chordata      | Pleuronectiformes               | P                      |          |
| Mooring Anchors SA-131 | Chordata      | <i>Trisopterus luscus</i>       | P                      |          |
| Mooring Anchors SA-131 | Chordata      | <i>Trisopterus minutus</i>      | P                      |          |
| Mooring Anchors SA-131 | Chordata      | Tunicata                        | P                      |          |
| Mooring Anchors SA-131 | Cnidaria      | Hydrozoa                        | P                      |          |
| Mooring Anchors SA-131 | Cnidaria      | <i>Kirchenpaueria</i> sp.       | P                      |          |
| Mooring Anchors SA-131 | Cnidaria      | <i>Metridium senile</i>         | P                      |          |
| Mooring Anchors SA-131 | Cnidaria      | <i>Nemertesia</i> sp.           | P                      |          |
| Mooring Anchors SA-131 | Cnidaria      | <i>Nemertesia ramosa</i>        | P                      |          |
| Mooring Anchors SA-131 | Cnidaria      | <i>Tubularia</i> sp.            | P                      |          |
| Mooring Anchors SA-131 | Cnidaria      | <i>Urticina</i> sp.             | P                      |          |
| Mooring Anchors SA-131 | Mollusca      | Cephalopoda eggs                | P                      |          |
| Mooring Anchors SA-131 | Mollusca      | <i>Loligo vulgaris</i>          | P                      |          |
| Mooring Anchors SA-131 | Mollusca      | Nudibranch eggs                 | P                      |          |
| Mooring Anchors SA-132 | Annelida      | <i>Spirobranchus</i> sp.        | P                      |          |
| Mooring Anchors SA-132 | Arthropoda    | Balanioidea                     | P                      |          |
| Mooring Anchors SA-132 | Arthropoda    | <i>Cancer pagurus</i>           | 3                      |          |
| Mooring Anchors SA-132 | Arthropoda    | <i>Ebalia</i> sp.               | 1                      |          |
| Mooring Anchors SA-132 | Arthropoda    | Galatheaidea                    | P                      |          |
| Mooring Anchors SA-132 | Arthropoda    | <i>Lithodes maja</i>            | 2                      |          |
| Mooring Anchors SA-132 | Arthropoda    | <i>Munida</i> sp.               | 1                      |          |
| Mooring Anchors SA-132 | Arthropoda    | Paguridae                       | 43                     |          |
| Mooring Anchors SA-132 | Arthropoda    | Palaemonidae                    | P                      |          |
| Mooring Anchors SA-132 | Chordata      | <i>Gadus morhua</i>             | P                      |          |
| Mooring Anchors SA-132 | Chordata      | <i>Melanogrammus aeglefinus</i> | P                      |          |
| Mooring Anchors SA-132 | Chordata      | <i>Merlangius merlangus</i>     | P                      |          |
| Mooring Anchors SA-132 | Chordata      | <i>Molva molva</i>              | P                      |          |
| Mooring Anchors SA-132 | Chordata      | Pleuronectiformes               | P                      |          |
| Mooring Anchors SA-132 | Chordata      | <i>Trisopterus</i> sp.          | P                      |          |
| Mooring Anchors SA-132 | Chordata      | <i>Trisopterus luscus</i>       | P                      |          |
| Mooring Anchors SA-132 | Chordata      | <i>Trisopterus minutus</i>      | P                      |          |
| Mooring Anchors SA-132 | Cnidaria      | Actiniaria                      | P                      |          |
| Mooring Anchors SA-132 | Cnidaria      | <i>Alcyonium digitatum</i>      | P                      |          |
| Mooring Anchors SA-132 | Cnidaria      | Hydrozoa                        | P                      |          |
| Mooring Anchors SA-132 | Cnidaria      | <i>Kirchenpaueria</i> sp.       | P                      |          |
| Mooring Anchors SA-132 | Cnidaria      | <i>Metridium senile</i>         | P                      |          |
| Mooring Anchors SA-132 | Cnidaria      | <i>Nemertesia</i> sp.           | P                      |          |
| Mooring Anchors SA-132 | Cnidaria      | <i>Nemertesia ramosa</i>        | P                      |          |
| Mooring Anchors SA-132 | Cnidaria      | <i>Tubularia</i> sp.            | P                      |          |
| Mooring Anchors SA-132 | Cnidaria      | <i>Urticina</i> sp.             | P                      |          |
| Mooring Anchors SA-132 | Echinodermata | <i>Asterias rubens</i>          | 1                      |          |

Supplementary table S1. List with identified taxa, structure, and quantity.

| STRUCTURE              | PHYLUM     | TAXA                            | QUANTITY/ PRESENCE (P) | COMMENTS |
|------------------------|------------|---------------------------------|------------------------|----------|
| Mooring Anchors SA-132 | Mollusca   | <i>Calliostoma sp.</i>          | 1                      |          |
| Mooring Anchors SA-132 | Mollusca   | Nudibranch eggs                 | P                      |          |
| Mooring Anchors SA-133 | Annelida   | Oweniidae                       | P                      |          |
| Mooring Anchors SA-133 | Annelida   | <i>Sabella sp.</i>              | P                      |          |
| Mooring Anchors SA-133 | Annelida   | <i>Sabellaria spinulosa</i>     | P                      |          |
| Mooring Anchors SA-133 | Annelida   | <i>Spirobranchus sp.</i>        | P                      |          |
| Mooring Anchors SA-133 | Arthropoda | Balanoidea                      | P                      |          |
| Mooring Anchors SA-133 | Arthropoda | <i>Cancer pagurus</i>           | 6                      |          |
| Mooring Anchors SA-133 | Arthropoda | Galatheaidea                    | 1                      |          |
| Mooring Anchors SA-133 | Arthropoda | <i>Lithodes maja</i>            | 3                      |          |
| Mooring Anchors SA-133 | Arthropoda | <i>Munida sp.</i>               | 1                      |          |
| Mooring Anchors SA-133 | Arthropoda | Paguridae                       | 70                     |          |
| Mooring Anchors SA-133 | Arthropoda | Palaemonidae                    | P                      |          |
| Mooring Anchors SA-133 | Bryozoa    | Bryozoa                         | P                      |          |
| Mooring Anchors SA-133 | Chordata   | Gadidae                         | P                      |          |
| Mooring Anchors SA-133 | Chordata   | <i>Gadus morhua</i>             | P                      |          |
| Mooring Anchors SA-133 | Chordata   | <i>Melanogrammus aeglefinus</i> | P                      |          |
| Mooring Anchors SA-133 | Chordata   | <i>Merlangius merlangus</i>     | P                      |          |
| Mooring Anchors SA-133 | Chordata   | <i>Pomatoschistus sp.</i>       | P                      |          |
| Mooring Anchors SA-133 | Chordata   | Scorpaeniformes                 | P                      |          |
| Mooring Anchors SA-133 | Chordata   | <i>Trisopterus sp.</i>          | P                      |          |
| Mooring Anchors SA-133 | Chordata   | <i>Trisopterus luscus</i>       | P                      |          |
| Mooring Anchors SA-133 | Chordata   | <i>Trisopterus minutus</i>      | P                      |          |
| Mooring Anchors SA-133 | Chordata   | Tunicata                        | P                      |          |
| Mooring Anchors SA-133 | Cnidaria   | <i>Alcyonium digitatum</i>      | P                      |          |
| Mooring Anchors SA-133 | Cnidaria   | Hydrozoa                        | P                      |          |
| Mooring Anchors SA-133 | Cnidaria   | <i>Nemertesia ramosa</i>        | P                      |          |
| Mooring Anchors SA-133 | Cnidaria   | <i>Tubularia sp.</i>            | P                      |          |
| Mooring Anchors SA-133 | Cnidaria   | <i>Urticina sp.</i>             | P                      |          |
| Mooring Anchors SA-133 | Mollusca   | Cephalopoda eggs                | P                      |          |
| Mooring Anchors SA-141 | Annelida   | <i>Spirobranchus sp.</i>        | P                      |          |
| Mooring Anchors SA-141 | Arthropoda | Balanoidea                      | P                      |          |
| Mooring Anchors SA-141 | Arthropoda | <i>Cancer pagurus</i>           | 5                      |          |
| Mooring Anchors SA-141 | Arthropoda | Galatheaidea                    | 2                      |          |
| Mooring Anchors SA-141 | Arthropoda | <i>Lithodes maja</i>            | 2                      |          |
| Mooring Anchors SA-141 | Arthropoda | Paguridae                       | 19                     |          |
| Mooring Anchors SA-141 | Chordata   | Scorpaeniformes                 | P                      |          |
| Mooring Anchors SA-141 | Cnidaria   | <i>Alcyonium digitatum</i>      | P                      |          |
| Mooring Anchors SA-141 | Cnidaria   | <i>Ectopleura larynx</i>        | P                      |          |
| Mooring Anchors SA-141 | Cnidaria   | Hydrozoa                        | P                      |          |
| Mooring Anchors SA-141 | Cnidaria   | <i>Metridium senile</i>         | P                      |          |
| Mooring Anchors SA-141 | Cnidaria   | <i>Nemertesia ramosa</i>        | P                      |          |
| Mooring Anchors SA-141 | Cnidaria   | <i>Tubularia indivisa</i>       | P                      |          |
| Mooring Anchors SA-141 | Cnidaria   | <i>Urticina sp.</i>             | P                      |          |
| Mooring Anchors SA-141 | Mollusca   | Cephalopoda eggs                | P                      |          |
| Mooring Anchors SA-142 | Annelida   | <i>Sabella sp.</i>              | P                      |          |
| Mooring Anchors SA-142 | Annelida   | <i>Sabellaria spinulosa</i>     | P                      |          |
| Mooring Anchors SA-142 | Annelida   | <i>Spirobranchus sp.</i>        | P                      |          |
| Mooring Anchors SA-142 | Arthropoda | Balanoidea                      | P                      |          |
| Mooring Anchors SA-142 | Arthropoda | <i>Cancer pagurus</i>           | 2                      |          |
| Mooring Anchors SA-142 | Arthropoda | Galatheaidea                    | P                      |          |
| Mooring Anchors SA-142 | Arthropoda | <i>Lithodes maja</i>            | 5                      |          |
| Mooring Anchors SA-142 | Arthropoda | Paguridae                       | P                      |          |
| Mooring Anchors SA-142 | Arthropoda | Palaemonidae                    | P                      |          |
| Mooring Anchors SA-142 | Bryozoa    | Bryozoa                         | P                      |          |
| Mooring Anchors SA-142 | Chordata   | Gadidae                         | P                      |          |
| Mooring Anchors SA-142 | Chordata   | <i>Molva molva</i>              | P                      |          |
| Mooring Anchors SA-142 | Chordata   | <i>Pleuronectes platessa</i>    | P                      |          |
| Mooring Anchors SA-142 | Chordata   | Pleuronectiformes               | P                      |          |
| Mooring Anchors SA-142 | Chordata   | <i>Trisopterus luscus</i>       | P                      |          |
| Mooring Anchors SA-142 | Cnidaria   | Hydrozoa                        | P                      |          |
| Mooring Anchors SA-142 | Cnidaria   | <i>Kirchenpaueria sp.</i>       | P                      |          |
| Mooring Anchors SA-142 | Cnidaria   | <i>Metridium senile</i>         | P                      |          |
| Mooring Anchors SA-142 | Cnidaria   | <i>Nemertesia sp.</i>           | P                      |          |
| Mooring Anchors SA-142 | Cnidaria   | <i>Tubularia sp.</i>            | P                      |          |
| Mooring Anchors SA-142 | Cnidaria   | <i>Urticina sp.</i>             | P                      |          |
| Mooring Anchors SA-142 | Mollusca   | Cephalopoda eggs                | P                      |          |
| Mooring Anchors SA-142 | Mollusca   | Gastropoda                      | P                      |          |
| Mooring Anchors SA-143 | Annelida   | <i>Spirobranchus sp.</i>        | P                      |          |
| Mooring Anchors SA-143 | Arthropoda | Balanoidea                      | P                      |          |
| Mooring Anchors SA-143 | Arthropoda | Brachyura                       | 1                      |          |
| Mooring Anchors SA-143 | Arthropoda | <i>Cancer pagurus</i>           | 3                      |          |
| Mooring Anchors SA-143 | Arthropoda | Galatheaidea                    | 3                      |          |
| Mooring Anchors SA-143 | Arthropoda | <i>Hyas sp.</i>                 | 2                      |          |
| Mooring Anchors SA-143 | Arthropoda | <i>Lithodes maja</i>            | 2                      |          |
| Mooring Anchors SA-143 | Arthropoda | Paguridae                       | 13                     |          |
| Mooring Anchors SA-143 | Arthropoda | Palaemonidae                    | P                      |          |
| Mooring Anchors SA-143 | Chordata   | Gadidae                         | P                      |          |
| Mooring Anchors SA-143 | Chordata   | Pleuronectiformes               | P                      |          |

**Supplementary table S1.** List with identified taxa, structure, and quantity.

| STRUCTURE              | PHYLUM        | TAXA                            | QUANTITY/ PRESENCE (P) | COMMENTS |
|------------------------|---------------|---------------------------------|------------------------|----------|
| Mooring Anchors SA-143 | Chordata      | <i>Trisopterus luscus</i>       | P                      |          |
| Mooring Anchors SA-143 | Cnidaria      | <i>Alcyonium digitatum</i>      | P                      |          |
| Mooring Anchors SA-143 | Cnidaria      | <i>Ectopleura larynx</i>        | P                      |          |
| Mooring Anchors SA-143 | Cnidaria      | Hydrozoa                        | P                      |          |
| Mooring Anchors SA-143 | Cnidaria      | <i>Metridium senile</i>         | P                      |          |
| Mooring Anchors SA-143 | Cnidaria      | <i>Nemertesia</i> sp.           | P                      |          |
| Mooring Anchors SA-143 | Cnidaria      | <i>Tubularia indivisa</i>       | P                      |          |
| Mooring Anchors SA-143 | Cnidaria      | <i>Urticina</i> sp.             | P                      |          |
| Mooring Anchors SA-143 | Mollusca      | <i>Edmundsella pedata</i>       | 1                      |          |
| Mooring Anchors SA-151 | Annelida      | <i>Spirobranchus</i> sp.        | P                      |          |
| Mooring Anchors SA-151 | Arthropoda    | Balanoidea                      | P                      |          |
| Mooring Anchors SA-151 | Arthropoda    | <i>Cancer pagurus</i>           | 2                      |          |
| Mooring Anchors SA-151 | Arthropoda    | Galatheoidea                    | 2                      |          |
| Mooring Anchors SA-151 | Arthropoda    | <i>Lithodes maja</i>            | P                      |          |
| Mooring Anchors SA-151 | Arthropoda    | Paguridae                       | P                      |          |
| Mooring Anchors SA-151 | Arthropoda    | Palaemonidae                    | P                      |          |
| Mooring Anchors SA-151 | Chordata      | Gadidae                         | P                      |          |
| Mooring Anchors SA-151 | Chordata      | <i>Melanogrammus aeglefinus</i> | P                      |          |
| Mooring Anchors SA-151 | Chordata      | Pleuronectiformes               | P                      |          |
| Mooring Anchors SA-151 | Chordata      | Scorpaeniformes                 | P                      |          |
| Mooring Anchors SA-151 | Cnidaria      | <i>Alcyonium digitatum</i>      | P                      |          |
| Mooring Anchors SA-151 | Cnidaria      | Hydrozoa                        | P                      |          |
| Mooring Anchors SA-151 | Cnidaria      | <i>Metridium senile</i>         | P                      |          |
| Mooring Anchors SA-151 | Cnidaria      | <i>Nemertesia ramosa</i>        | P                      |          |
| Mooring Anchors SA-151 | Cnidaria      | <i>Tubularia</i> sp.            | P                      |          |
| Mooring Anchors SA-151 | Cnidaria      | <i>Tubularia indivisa</i>       | P                      |          |
| Mooring Anchors SA-151 | Cnidaria      | <i>Urticina</i> sp.             | P                      |          |
| Mooring Anchors SA-151 | Mollusca      | Cephalopoda eggs                | P                      |          |
| Mooring Anchors SA-152 | Annelida      | <i>Sabella</i> sp.              | P                      |          |
| Mooring Anchors SA-152 | Annelida      | <i>Spirobranchus</i> sp.        | P                      |          |
| Mooring Anchors SA-152 | Arthropoda    | Balanoidea                      | P                      |          |
| Mooring Anchors SA-152 | Arthropoda    | <i>Cancer pagurus</i>           | 4                      |          |
| Mooring Anchors SA-152 | Arthropoda    | Galatheoidea                    | 2                      |          |
| Mooring Anchors SA-152 | Arthropoda    | <i>Lithodes maja</i>            | 1                      |          |
| Mooring Anchors SA-152 | Arthropoda    | Paguridae                       | P                      |          |
| Mooring Anchors SA-152 | Arthropoda    | Palaemonidae                    | 4                      |          |
| Mooring Anchors SA-152 | Chordata      | Gadidae                         | P                      |          |
| Mooring Anchors SA-152 | Chordata      | <i>Melanogrammus aeglefinus</i> | P                      |          |
| Mooring Anchors SA-152 | Chordata      | <i>Molva molva</i>              | P                      |          |
| Mooring Anchors SA-152 | Chordata      | Pleuronectiformes               | P                      |          |
| Mooring Anchors SA-152 | Chordata      | <i>Trisopterus luscus</i>       | P                      |          |
| Mooring Anchors SA-152 | Chordata      | <i>Trisopterus minutus</i>      | P                      |          |
| Mooring Anchors SA-152 | Cnidaria      | Hydrozoa                        | P                      |          |
| Mooring Anchors SA-152 | Cnidaria      | <i>Metridium senile</i>         | P                      |          |
| Mooring Anchors SA-152 | Cnidaria      | <i>Nemertesia ramosa</i>        | P                      |          |
| Mooring Anchors SA-152 | Cnidaria      | <i>Tubularia</i> sp.            | P                      |          |
| Mooring Anchors SA-152 | Cnidaria      | <i>Tubularia indivisa</i>       | P                      |          |
| Mooring Anchors SA-152 | Cnidaria      | <i>Urticina</i> sp.             | P                      |          |
| Mooring Anchors SA-152 | Mollusca      | Cephalopoda eggs                | P                      |          |
| Mooring Anchors SA-153 | Annelida      | <i>Sabella</i> sp.              | P                      |          |
| Mooring Anchors SA-153 | Annelida      | <i>Sabellaria spinulosa</i>     | P                      |          |
| Mooring Anchors SA-153 | Annelida      | <i>Spirobranchus</i> sp.        | P                      |          |
| Mooring Anchors SA-153 | Arthropoda    | Balanoidea                      | P                      |          |
| Mooring Anchors SA-153 | Arthropoda    | <i>Cancer pagurus</i>           | 2                      |          |
| Mooring Anchors SA-153 | Arthropoda    | Galatheoidea                    | 1                      |          |
| Mooring Anchors SA-153 | Arthropoda    | <i>Lithodes maja</i>            | 1                      |          |
| Mooring Anchors SA-153 | Arthropoda    | <i>Munida</i> sp.               | 1                      |          |
| Mooring Anchors SA-153 | Arthropoda    | <i>Necora puber</i>             | 1                      |          |
| Mooring Anchors SA-153 | Arthropoda    | Paguridae                       | 36                     |          |
| Mooring Anchors SA-153 | Arthropoda    | Palaemonidae                    | P                      |          |
| Mooring Anchors SA-153 | Bryozoa       | <i>Alcyonidium</i> sp.          | P                      |          |
| Mooring Anchors SA-153 | Chordata      | Gadidae                         | P                      |          |
| Mooring Anchors SA-153 | Chordata      | <i>Melanogrammus aeglefinus</i> | P                      |          |
| Mooring Anchors SA-153 | Chordata      | <i>Merlangius merlangus</i>     | P                      |          |
| Mooring Anchors SA-153 | Chordata      | Pleuronectiformes               | P                      |          |
| Mooring Anchors SA-153 | Chordata      | Triglidae                       | P                      |          |
| Mooring Anchors SA-153 | Chordata      | <i>Trisopterus</i> sp.          | P                      |          |
| Mooring Anchors SA-153 | Chordata      | <i>Trisopterus luscus</i>       | P                      |          |
| Mooring Anchors SA-153 | Cnidaria      | <i>Alcyonium digitatum</i>      | P                      |          |
| Mooring Anchors SA-153 | Cnidaria      | Hydrozoa                        | P                      |          |
| Mooring Anchors SA-153 | Cnidaria      | <i>Kirchenpaueria</i> sp.       | P                      |          |
| Mooring Anchors SA-153 | Cnidaria      | <i>Metridium senile</i>         | P                      |          |
| Mooring Anchors SA-153 | Cnidaria      | <i>Nemertesia antennina</i>     | P                      |          |
| Mooring Anchors SA-153 | Cnidaria      | <i>Nemertesia ramosa</i>        | P                      |          |
| Mooring Anchors SA-153 | Cnidaria      | <i>Tubularia</i> sp.            | P                      |          |
| Mooring Anchors SA-153 | Cnidaria      | <i>Urticina</i> sp.             | P                      |          |
| Mooring Anchors SA-153 | Echinodermata | <i>Asterias rubens</i>          | 6                      |          |
| Mooring Anchors SA-153 | Mollusca      | <i>Calliostoma</i> sp.          | 1                      |          |
| Mooring Anchors SA-153 | Mollusca      | Cephalopoda eggs                | P                      |          |

**Supplementary table S1.** List with identified taxa, structure, and quantity.

| STRUCTURE              | PHYLUM        | TAXA                            | QUANTITY/ PRESENCE (P) | COMMENTS                   |
|------------------------|---------------|---------------------------------|------------------------|----------------------------|
| Mooring Anchors SA-153 | Mollusca      | Nudibranch eggs                 | P                      |                            |
| Mooring Anchors SA-153 | Mollusca      | Scaphopoda                      | P                      |                            |
| Mooring Line 111       | Annelida      | <i>Sabella</i> sp.              | P                      |                            |
| Mooring Line 111       | Annelida      | <i>Spirobranchus</i> sp.        | P                      |                            |
| Mooring Line 111       | Arthropoda    | Balanioidea                     | P                      |                            |
| Mooring Line 111       | Arthropoda    | Brachyura                       | 1                      |                            |
| Mooring Line 111       | Arthropoda    | <i>Cancer pagurus</i>           | 4                      |                            |
| Mooring Line 111       | Arthropoda    | Galatheaidea                    | 11                     |                            |
| Mooring Line 111       | Arthropoda    | <i>Lithodes maja</i>            | 15                     |                            |
| Mooring Line 111       | Arthropoda    | Paguridae                       | 65                     |                            |
| Mooring Line 111       | Arthropoda    | Palaemonidae                    | P                      |                            |
| Mooring Line 111       | Bryozoa       | Bryozoa                         | P                      |                            |
| Mooring Line 111       | Bryozoa       | <i>Flustra foliacea</i>         | P                      |                            |
| Mooring Line 111       | Chordata      | Gadidae                         | P                      |                            |
| Mooring Line 111       | Chordata      | <i>Gadus morhua</i>             | P                      |                            |
| Mooring Line 111       | Chordata      | <i>Melanogrammus aeglefinus</i> | P                      |                            |
| Mooring Line 111       | Chordata      | <i>Molva molva</i>              | P                      |                            |
| Mooring Line 111       | Chordata      | Pleuronectiformes               | P                      |                            |
| Mooring Line 111       | Chordata      | <i>Trisopterus</i> sp.          | P                      |                            |
| Mooring Line 111       | Chordata      | <i>Trisopterus luscus</i>       | P                      |                            |
| Mooring Line 111       | Chordata      | <i>Trisopterus minutus</i>      | P                      |                            |
| Mooring Line 111       | Cnidaria      | <i>Ectopleura larynx</i>        | P                      |                            |
| Mooring Line 111       | Cnidaria      | Hydrozoa                        | P                      |                            |
| Mooring Line 111       | Cnidaria      | <i>Metridium senile</i>         | P                      |                            |
| Mooring Line 111       | Cnidaria      | <i>Nemertesia</i> sp.           | P                      |                            |
| Mooring Line 111       | Cnidaria      | <i>Nemertesia ramosa</i>        | P                      |                            |
| Mooring Line 111       | Cnidaria      | <i>Tubularia indivisa</i>       | P                      |                            |
| Mooring Line 111       | Cnidaria      | <i>Urticina</i> sp.             | P                      |                            |
| Mooring Line 111       | Echinodermata | <i>Asterias rubens</i>          | 14                     |                            |
| Mooring Line 111       | Echinodermata | Asteroidea                      | 802                    | Potentially underestimated |
| Mooring Line 111       | Echinodermata | Echinidea                       | 146                    | Potentially underestimated |
| Mooring Line 111       | Echinodermata | <i>Echinus</i> sp.              | 1                      |                            |
| Mooring Line 111       | Echinodermata | <i>Henricia</i> sp.             | 3                      |                            |
| Mooring Line 111       | Echinodermata | <i>Luidia ciliaris</i>          | 1                      |                            |
| Mooring Line 111       | Echinodermata | <i>Stichastrella</i> sp.        | 1                      |                            |
| Mooring Line 111       | Mollusca      | <i>Buccinum</i> sp.             | P                      |                            |
| Mooring Line 111       | Mollusca      | Cephalopoda eggs                | P                      |                            |
| Mooring Line 111       | Mollusca      | <i>Loligo vulgaris</i>          | P                      |                            |
| Mooring Line 111       | Mollusca      | Nudibranchia                    | 2                      |                            |
| Mooring Line 111       | Mollusca      | Scaphopoda                      | P                      |                            |
| Mooring Line 111       | Porifera      | Porifera                        | P                      |                            |
| Mooring Line 112       | Annelida      | <i>Filograna</i> sp.            | P                      |                            |
| Mooring Line 112       | Annelida      | <i>Sabella</i> sp.              | P                      |                            |
| Mooring Line 112       | Annelida      | <i>Sabellaria spinulosa</i>     | P                      |                            |
| Mooring Line 112       | Annelida      | <i>Spirobranchus</i> sp.        | P                      |                            |
| Mooring Line 112       | Arthropoda    | Balanioidea                     | P                      |                            |
| Mooring Line 112       | Arthropoda    | <i>Cancer pagurus</i>           | 4                      |                            |
| Mooring Line 112       | Arthropoda    | Galatheaidea                    | 1                      |                            |
| Mooring Line 112       | Arthropoda    | <i>Hys</i> sp.                  | 1                      |                            |
| Mooring Line 112       | Arthropoda    | Inachidae                       | P                      |                            |
| Mooring Line 112       | Arthropoda    | <i>Liocarcinus</i> sp.          | 1                      |                            |
| Mooring Line 112       | Arthropoda    | <i>Lithodes maja</i>            | 12                     |                            |
| Mooring Line 112       | Arthropoda    | <i>Munida</i> sp.               | 7                      |                            |
| Mooring Line 112       | Arthropoda    | Paguridae                       | 111                    |                            |
| Mooring Line 112       | Arthropoda    | Palaemonidae                    | P                      |                            |
| Mooring Line 112       | Bryozoa       | <i>Alcyonidium</i> sp.          | P                      |                            |
| Mooring Line 112       | Chordata      | <i>Agonus cataphractus</i>      | P                      |                            |
| Mooring Line 112       | Chordata      | Gadidae                         | P                      |                            |
| Mooring Line 112       | Chordata      | <i>Melanogrammus aeglefinus</i> | P                      |                            |
| Mooring Line 112       | Chordata      | <i>Merlangius merlangus</i>     | P                      |                            |
| Mooring Line 112       | Chordata      | <i>Molva molva</i>              | P                      |                            |
| Mooring Line 112       | Chordata      | Pleuronectiformes               | P                      |                            |
| Mooring Line 112       | Chordata      | Scorpaeniformes                 | P                      |                            |
| Mooring Line 112       | Chordata      | <i>Trisopterus</i> sp.          | P                      |                            |
| Mooring Line 112       | Chordata      | <i>Trisopterus luscus</i>       | P                      |                            |
| Mooring Line 112       | Cnidaria      | <i>Alcyonium digitatum</i>      | P                      |                            |
| Mooring Line 112       | Cnidaria      | <i>Bolocera</i> sp.             | P                      |                            |
| Mooring Line 112       | Cnidaria      | <i>Ectopleura larynx</i>        | P                      |                            |
| Mooring Line 112       | Cnidaria      | Hydrozoa                        | P                      |                            |
| Mooring Line 112       | Cnidaria      | <i>Kirchenpaueria</i> sp.       | P                      |                            |
| Mooring Line 112       | Cnidaria      | <i>Metridium senile</i>         | P                      |                            |
| Mooring Line 112       | Cnidaria      | <i>Nemertesia antennina</i>     | P                      |                            |
| Mooring Line 112       | Cnidaria      | <i>Nemertesia ramosa</i>        | P                      |                            |
| Mooring Line 112       | Cnidaria      | <i>Tubularia</i> sp.            | P                      |                            |
| Mooring Line 112       | Cnidaria      | <i>Tubularia indivisa</i>       | P                      |                            |
| Mooring Line 112       | Cnidaria      | <i>Urticina</i> sp.             | P                      |                            |
| Mooring Line 112       | Cnidaria      | <i>Urticina eques</i>           | P                      |                            |
| Mooring Line 112       | Cnidaria      | <i>Virgularia</i> sp.           | P                      |                            |
| Mooring Line 112       | Echinodermata | <i>Asterias rubens</i>          | 30                     |                            |



**Supplementary table S1.** List with identified taxa, structure, and quantity.

| STRUCTURE        | PHYLUM        | TAXA                            | QUANTITY/ PRESENCE (P) | COMMENTS                   |
|------------------|---------------|---------------------------------|------------------------|----------------------------|
| Mooring Line 112 | Echinodermata | Asterioidea                     | 97                     | Potentially underestimated |
| Mooring Line 112 | Echinodermata | Echinidea                       | 55                     | Potentially underestimated |
| Mooring Line 112 | Echinodermata | <i>Echinus</i> sp.              | 46                     | Potentially underestimated |
| Mooring Line 112 | Echinodermata | <i>Luidia sarsii</i>            | P                      |                            |
| Mooring Line 112 | Echinodermata | <i>Ophiura sarsii</i>           | 1                      |                            |
| Mooring Line 112 | Echinodermata | <i>Stichastrella</i> sp.        | 6                      |                            |
| Mooring Line 112 | Mollusca      | <i>Calliostoma</i> sp.          | 1                      |                            |
| Mooring Line 112 | Mollusca      | Nudibranch eggs                 | P                      |                            |
| Mooring Line 112 | Mollusca      | Scaphopoda                      | P                      |                            |
| Mooring Line 112 | Mollusca      | Sepioidea                       | 1                      |                            |
| Mooring Line 113 | Annelida      | <i>Filograna</i> sp.            | P                      |                            |
| Mooring Line 113 | Annelida      | <i>Sabella</i> sp.              | P                      |                            |
| Mooring Line 113 | Annelida      | <i>Sabellaria spinulosa</i>     | P                      |                            |
| Mooring Line 113 | Annelida      | <i>Spirobranchus</i> sp.        | P                      |                            |
| Mooring Line 113 | Arthropoda    | <i>Cancer pagurus</i>           | 6                      |                            |
| Mooring Line 113 | Arthropoda    | Galatheaidea                    | 2                      |                            |
| Mooring Line 113 | Arthropoda    | <i>Liocarcinus</i> sp.          | 1                      |                            |
| Mooring Line 113 | Arthropoda    | <i>Lithodes maja</i>            | 10                     |                            |
| Mooring Line 113 | Arthropoda    | <i>Munida</i> sp.               | 7                      |                            |
| Mooring Line 113 | Arthropoda    | Paguridae                       | 132                    |                            |
| Mooring Line 113 | Arthropoda    | Palaemonidae                    | P                      |                            |
| Mooring Line 113 | Bryozoa       | <i>Alcyonidium</i> sp.          | P                      |                            |
| Mooring Line 113 | Bryozoa       | Bryozoa                         | P                      |                            |
| Mooring Line 113 | Bryozoa       | <i>Flustra foliacea</i>         | P                      |                            |
| Mooring Line 113 | Chordata      | Ammodytidae                     | P                      |                            |
| Mooring Line 113 | Chordata      | Gadidae                         | P                      |                            |
| Mooring Line 113 | Chordata      | <i>Gadus morhua</i>             | P                      |                            |
| Mooring Line 113 | Chordata      | <i>Melanogrammus aeglefinus</i> | P                      |                            |
| Mooring Line 113 | Chordata      | <i>Merlangius merlangus</i>     | P                      |                            |
| Mooring Line 113 | Chordata      | Molva molva                     | P                      |                            |
| Mooring Line 113 | Chordata      | Pleuronectiformes               | P                      |                            |
| Mooring Line 113 | Chordata      | <i>Trisopterus</i> sp.          | P                      |                            |
| Mooring Line 113 | Chordata      | <i>Trisopterus luscus</i>       | P                      |                            |
| Mooring Line 113 | Chordata      | <i>Trisopterus minutus</i>      | P                      |                            |
| Mooring Line 113 | Cnidaria      | Actiniaria                      | P                      |                            |
| Mooring Line 113 | Cnidaria      | <i>Alcyonium digitatum</i>      | P                      |                            |
| Mooring Line 113 | Cnidaria      | <i>Bolocera</i> sp.             | P                      |                            |
| Mooring Line 113 | Cnidaria      | <i>Ectopleura larynx</i>        | P                      |                            |
| Mooring Line 113 | Cnidaria      | Hydrozoa                        | P                      |                            |
| Mooring Line 113 | Cnidaria      | <i>Kirchenpaueria</i> sp.       | P                      |                            |
| Mooring Line 113 | Cnidaria      | <i>Metridium senile</i>         | P                      |                            |
| Mooring Line 113 | Cnidaria      | <i>Nemertesia</i> sp.           | P                      |                            |
| Mooring Line 113 | Cnidaria      | <i>Nemertesia antennina</i>     | P                      |                            |
| Mooring Line 113 | Cnidaria      | <i>Nemertesia ramosa</i>        | P                      |                            |
| Mooring Line 113 | Cnidaria      | <i>Sagartia</i> sp.             | P                      |                            |
| Mooring Line 113 | Cnidaria      | <i>Sertularia</i> sp.           | P                      |                            |
| Mooring Line 113 | Cnidaria      | <i>Tubularia</i> sp.            | P                      |                            |
| Mooring Line 113 | Cnidaria      | <i>Tubularia indivisa</i>       | P                      |                            |
| Mooring Line 113 | Cnidaria      | <i>Urticina</i> sp.             | P                      |                            |
| Mooring Line 113 | Cnidaria      | <i>Virgularia</i> sp.           | P                      |                            |
| Mooring Line 113 | Echinodermata | <i>Asterias rubens</i>          | 73                     |                            |
| Mooring Line 113 | Echinodermata | Asterioidea                     | 555                    | Potentially underestimated |
| Mooring Line 113 | Echinodermata | <i>Astropecten irregularis</i>  | 1                      |                            |
| Mooring Line 113 | Echinodermata | Echinidea                       | 157                    | Potentially underestimated |
| Mooring Line 113 | Echinodermata | <i>Echinus</i> sp.              | 1                      |                            |
| Mooring Line 113 | Echinodermata | <i>Henricia</i> sp.             | 2                      |                            |
| Mooring Line 113 | Echinodermata | <i>Luidia</i> sp.               | 2                      |                            |
| Mooring Line 113 | Echinodermata | <i>Luidia ciliaris</i>          | 4                      |                            |
| Mooring Line 113 | Echinodermata | <i>Luidia sarsii</i>            | P                      |                            |
| Mooring Line 113 | Echinodermata | <i>Ophiura</i> sp.              | 1                      |                            |
| Mooring Line 113 | Echinodermata | <i>Stichastrella</i> sp.        | 5                      |                            |
| Mooring Line 113 | Mollusca      | <i>Calliostoma</i> sp.          | 1                      |                            |
| Mooring Line 113 | Mollusca      | Cephalopoda eggs                | P                      |                            |
| Mooring Line 113 | Mollusca      | Nudibranch eggs                 | P                      |                            |
| Mooring Line 113 | Mollusca      | Nudibranchia                    | 1                      |                            |
| Mooring Line 113 | Mollusca      | Scaphopoda                      | P                      |                            |
| Mooring Line 113 | Porifera      | Porifera                        | P                      |                            |
| Mooring Line 113 | Rhodophyta    | Rhodophyta                      | P                      |                            |
| Mooring Line 121 | Annelida      | <i>Sabella</i> sp.              | P                      |                            |
| Mooring Line 121 | Annelida      | <i>Spirobranchus</i> sp.        | P                      |                            |
| Mooring Line 121 | Arthropoda    | Balanioidea                     | P                      |                            |
| Mooring Line 121 | Arthropoda    | <i>Cancer pagurus</i>           | 3                      |                            |
| Mooring Line 121 | Arthropoda    | Galatheaidea                    | 2                      |                            |
| Mooring Line 121 | Arthropoda    | <i>Lithodes maja</i>            | 13                     |                            |
| Mooring Line 121 | Arthropoda    | <i>Munida</i> sp.               | 31                     |                            |
| Mooring Line 121 | Arthropoda    | Paguridae                       | 22                     |                            |
| Mooring Line 121 | Arthropoda    | Palaemonidae                    | 10                     |                            |
| Mooring Line 121 | Bryozoa       | Bryozoa                         | P                      |                            |
| Mooring Line 121 | Bryozoa       | <i>Flustra foliacea</i>         | P                      |                            |

**Supplementary table S1.** List with identified taxa, structure, and quantity.

| STRUCTURE        | PHYLUM        | TAXA                            | QUANTITY/ PRESENCE (P) | COMMENTS                   |
|------------------|---------------|---------------------------------|------------------------|----------------------------|
| Mooring Line 121 | Chordata      | Gadidae                         | P                      |                            |
| Mooring Line 121 | Chordata      | <i>Melanogrammus aeglefinus</i> | P                      |                            |
| Mooring Line 121 | Chordata      | <i>Molva molva</i>              | P                      |                            |
| Mooring Line 121 | Chordata      | <i>Pleuronectiformes</i>        | P                      |                            |
| Mooring Line 121 | Chordata      | <i>Trisopterus luscus</i>       | P                      |                            |
| Mooring Line 121 | Cnidaria      | <i>Alcyonium digitatum</i>      | P                      |                            |
| Mooring Line 121 | Cnidaria      | Hydrozoa                        | P                      |                            |
| Mooring Line 121 | Cnidaria      | <i>Metridium senile</i>         | P                      |                            |
| Mooring Line 121 | Cnidaria      | <i>Nemertesia ramosa</i>        | P                      |                            |
| Mooring Line 121 | Cnidaria      | <i>Tubularia sp.</i>            | P                      |                            |
| Mooring Line 121 | Cnidaria      | <i>Tubularia indivisa</i>       | P                      |                            |
| Mooring Line 121 | Cnidaria      | <i>Urticina sp.</i>             | P                      |                            |
| Mooring Line 121 | Echinodermata | <i>Asterias rubens</i>          | 116                    |                            |
| Mooring Line 121 | Echinodermata | Asteroidea                      | 257                    | Potentially underestimated |
| Mooring Line 121 | Echinodermata | Echinidea                       | 60                     | Potentially underestimated |
| Mooring Line 121 | Echinodermata | <i>Hippasteria phrygiana</i>    | 1                      |                            |
| Mooring Line 121 | Echinodermata | <i>Luidia ciliaris</i>          | P                      |                            |
| Mooring Line 121 | Echinodermata | <i>Stichastrella sp.</i>        | 13                     |                            |
| Mooring Line 121 | Mollusca      | Cephalopoda eggs                | P                      |                            |
| Mooring Line 121 | Mollusca      | <i>Loligo vulgaris</i>          | P                      |                            |
| Mooring Line 121 | Mollusca      | Nudibranch eggs                 | P                      |                            |
| Mooring Line 121 | Phaeophyceae  | <i>Laminaria sp.</i>            | P                      |                            |
| Mooring Line 121 | Rhodophyta    | Rhodophyta                      | P                      |                            |
| Mooring Line 122 | Annelida      | <i>Sabella sp.</i>              | P                      |                            |
| Mooring Line 122 | Annelida      | <i>Sabellaria spinulosa</i>     | P                      |                            |
| Mooring Line 122 | Annelida      | <i>Spirobranchus sp.</i>        | P                      |                            |
| Mooring Line 122 | Arthropoda    | Balanoidea                      | P                      |                            |
| Mooring Line 122 | Arthropoda    | Brachyura                       | 2                      |                            |
| Mooring Line 122 | Arthropoda    | <i>Cancer pagurus</i>           | 6                      |                            |
| Mooring Line 122 | Arthropoda    | Galatheoidea                    | 29                     |                            |
| Mooring Line 122 | Arthropoda    | Inachidae                       | 1                      |                            |
| Mooring Line 122 | Arthropoda    | <i>Lithodes maja</i>            | 10                     |                            |
| Mooring Line 122 | Arthropoda    | Paguridae                       | 15                     | Potentially underestimated |
| Mooring Line 122 | Bryozoa       | <i>Flustra foliacea</i>         | P                      |                            |
| Mooring Line 122 | Chordata      | Gadidae                         | P                      |                            |
| Mooring Line 122 | Chordata      | <i>Hyperoplus sp.</i>           | P                      |                            |
| Mooring Line 122 | Chordata      | <i>Melanogrammus aeglefinus</i> | P                      |                            |
| Mooring Line 122 | Chordata      | <i>Pleuronectiformes</i>        | P                      |                            |
| Mooring Line 122 | Chordata      | <i>Scorpaeniformes</i>          | P                      |                            |
| Mooring Line 122 | Chordata      | <i>Trisopterus luscus</i>       | P                      |                            |
| Mooring Line 122 | Cnidaria      | Hydrozoa                        | P                      |                            |
| Mooring Line 122 | Cnidaria      | <i>Metridium senile</i>         | P                      |                            |
| Mooring Line 122 | Cnidaria      | <i>Nemertesia ramosa</i>        | P                      |                            |
| Mooring Line 122 | Cnidaria      | <i>Tubularia sp.</i>            | P                      |                            |
| Mooring Line 122 | Cnidaria      | <i>Tubularia indivisa</i>       | P                      |                            |
| Mooring Line 122 | Cnidaria      | <i>Urticina sp.</i>             | P                      |                            |
| Mooring Line 122 | Cnidaria      | <i>Virgularia sp.</i>           | P                      |                            |
| Mooring Line 122 | Echinodermata | <i>Asterias rubens</i>          | 103                    | Potentially underestimated |
| Mooring Line 122 | Echinodermata | Asteroidea                      | 306                    | Potentially underestimated |
| Mooring Line 122 | Echinodermata | Echinidea                       | 6                      |                            |
| Mooring Line 122 | Echinodermata | <i>Echinus sp.</i>              | 2                      |                            |
| Mooring Line 122 | Echinodermata | <i>Henricia sp.</i>             | P                      |                            |
| Mooring Line 122 | Echinodermata | <i>Leptasterias sp.</i>         | 40                     |                            |
| Mooring Line 122 | Echinodermata | <i>Luidia ciliaris</i>          | 3                      |                            |
| Mooring Line 122 | Mollusca      | Cephalopoda eggs                | P                      |                            |
| Mooring Line 122 | Mollusca      | <i>Mytilus sp.</i>              | P                      |                            |
| Mooring Line 122 | Mollusca      | Nudibranch eggs                 | P                      |                            |
| Mooring Line 122 | Rhodophyta    | Rhodophyta                      | P                      |                            |
| Mooring Line 123 | Annelida      | <i>Sabella sp.</i>              | P                      |                            |
| Mooring Line 123 | Annelida      | <i>Spirobranchus sp.</i>        | P                      |                            |
| Mooring Line 123 | Arthropoda    | Balanoidea                      | P                      |                            |
| Mooring Line 123 | Arthropoda    | <i>Cancer pagurus</i>           | 6                      |                            |
| Mooring Line 123 | Arthropoda    | Galatheoidea                    | 5                      |                            |
| Mooring Line 123 | Arthropoda    | <i>Lithodes maja</i>            | 7                      |                            |
| Mooring Line 123 | Arthropoda    | Paguridae                       | 7                      |                            |
| Mooring Line 123 | Bryozoa       | Bryozoa                         | P                      |                            |
| Mooring Line 123 | Bryozoa       | <i>Flustra foliacea</i>         | P                      |                            |
| Mooring Line 123 | Chordata      | Ammodytidae                     | P                      |                            |
| Mooring Line 123 | Chordata      | <i>Melanogrammus aeglefinus</i> | P                      |                            |
| Mooring Line 123 | Chordata      | <i>Pleuronectiformes</i>        | P                      |                            |
| Mooring Line 123 | Chordata      | <i>Scorpaeniformes</i>          | P                      |                            |
| Mooring Line 123 | Chordata      | <i>Trisopterus sp.</i>          | P                      |                            |
| Mooring Line 123 | Chordata      | <i>Trisopterus luscus</i>       | P                      |                            |
| Mooring Line 123 | Cnidaria      | Actiniaria                      | P                      |                            |
| Mooring Line 123 | Cnidaria      | <i>Alcyonium digitatum</i>      | P                      |                            |
| Mooring Line 123 | Cnidaria      | <i>Ectopleura larynx</i>        | P                      |                            |
| Mooring Line 123 | Cnidaria      | Hydrozoa                        | P                      |                            |
| Mooring Line 123 | Cnidaria      | <i>Metridium senile</i>         | P                      |                            |
| Mooring Line 123 | Cnidaria      | <i>Nemertesia ramosa</i>        | P                      |                            |

**Supplementary table S1.** List with identified taxa, structure, and quantity.

| STRUCTURE        | PHYLUM        | TAXA                            | QUANTITY/ PRESENCE (P) | COMMENTS                   |
|------------------|---------------|---------------------------------|------------------------|----------------------------|
| Mooring Line 123 | Cnidaria      | <i>Tubularia sp.</i>            | P                      |                            |
| Mooring Line 123 | Cnidaria      | <i>Urticina sp.</i>             | P                      |                            |
| Mooring Line 123 | Cnidaria      | <i>Virgularia sp.</i>           | P                      |                            |
| Mooring Line 123 | Echinodermata | <i>Asterias rubens</i>          | 99                     | Potentially underestimated |
| Mooring Line 123 | Echinodermata | Asteroidae                      | 98                     | Potentially underestimated |
| Mooring Line 123 | Echinodermata | Echinidea                       | 9                      |                            |
| Mooring Line 123 | Echinodermata | <i>Henricia sp.</i>             | 2                      |                            |
| Mooring Line 123 | Echinodermata | <i>Leptasterias sp.</i>         | 9                      |                            |
| Mooring Line 123 | Echinodermata | <i>Luidia ciliaris</i>          | P                      |                            |
| Mooring Line 123 | Mollusca      | Cephalopoda eggs                | P                      |                            |
| Mooring Line 123 | Mollusca      | <i>Loligo vulgaris</i>          | P                      |                            |
| Mooring Line 123 | Rhodophyta    | Rhodophyta                      | P                      |                            |
| Mooring Line 131 | Annelida      | <i>Sabella sp.</i>              | P                      |                            |
| Mooring Line 131 | Annelida      | <i>Sabellaria spinulosa</i>     | P                      |                            |
| Mooring Line 131 | Annelida      | <i>Spirobranchus sp.</i>        | P                      |                            |
| Mooring Line 131 | Arthropoda    | Balanioidea                     | P                      |                            |
| Mooring Line 131 | Arthropoda    | <i>Cancer pagurus</i>           | 7                      |                            |
| Mooring Line 131 | Arthropoda    | Galatheaidea                    | 70                     |                            |
| Mooring Line 131 | Arthropoda    | <i>Hyas sp.</i>                 | P                      |                            |
| Mooring Line 131 | Arthropoda    | Inachidae                       | 3                      |                            |
| Mooring Line 131 | Arthropoda    | <i>Lithodes maja</i>            | 4                      |                            |
| Mooring Line 131 | Arthropoda    | Paguridae                       | 271                    |                            |
| Mooring Line 131 | Arthropoda    | Palaemonidae                    | P                      |                            |
| Mooring Line 131 | Bryozoa       | Bryozoa                         | P                      |                            |
| Mooring Line 131 | Bryozoa       | <i>Flustra foliacea</i>         | P                      |                            |
| Mooring Line 131 | Chordata      | Gadidae                         | P                      |                            |
| Mooring Line 131 | Chordata      | <i>Gadus morhua</i>             | P                      |                            |
| Mooring Line 131 | Chordata      | <i>Leucoraja naevus</i>         | P                      |                            |
| Mooring Line 131 | Chordata      | <i>Melanogrammus aeglefinus</i> | P                      |                            |
| Mooring Line 131 | Chordata      | <i>Merlangius merlangus</i>     | P                      |                            |
| Mooring Line 131 | Chordata      | Pleuronectiformes               | P                      |                            |
| Mooring Line 131 | Chordata      | <i>Trisopterus luscus</i>       | P                      |                            |
| Mooring Line 131 | Cnidaria      | <i>Alcyonium digitatum</i>      | P                      |                            |
| Mooring Line 131 | Cnidaria      | <i>Bolocera sp.</i>             | P                      |                            |
| Mooring Line 131 | Cnidaria      | Hydrozoa                        | P                      |                            |
| Mooring Line 131 | Cnidaria      | <i>Kirchenpaueria sp.</i>       | P                      |                            |
| Mooring Line 131 | Cnidaria      | <i>Metridium senile</i>         | P                      |                            |
| Mooring Line 131 | Cnidaria      | <i>Nemertesia sp.</i>           | P                      |                            |
| Mooring Line 131 | Cnidaria      | <i>Nemertesia ramosa</i>        | P                      |                            |
| Mooring Line 131 | Cnidaria      | <i>Tubularia sp.</i>            | P                      |                            |
| Mooring Line 131 | Cnidaria      | <i>Urticina sp.</i>             | P                      |                            |
| Mooring Line 131 | Echinodermata | <i>Asterias rubens</i>          | 605                    | Potentially underestimated |
| Mooring Line 131 | Echinodermata | Asteroidae                      | 98                     | Potentially underestimated |
| Mooring Line 131 | Echinodermata | Echinidea                       | 5                      |                            |
| Mooring Line 131 | Echinodermata | <i>Luidia sarsii</i>            | P                      |                            |
| Mooring Line 131 | Echinodermata | <i>Ophiura sarsii</i>           | P                      |                            |
| Mooring Line 131 | Mollusca      | <i>Calliostoma sp.</i>          | 1                      |                            |
| Mooring Line 131 | Mollusca      | Cephalopoda eggs                | P                      |                            |
| Mooring Line 131 | Mollusca      | <i>Loligo vulgaris</i>          | P                      |                            |
| Mooring Line 131 | Mollusca      | Nudibranch eggs                 | P                      |                            |
| Mooring Line 131 | Mollusca      | <i>Octopus vulgaris</i>         | P                      |                            |
| Mooring Line 131 | Mollusca      | Sepioidea                       | P                      |                            |
| Mooring Line 131 | Rhodophyta    | Rhodophyta                      | P                      |                            |
| Mooring Line 132 | Annelida      | <i>Sabella sp.</i>              | P                      |                            |
| Mooring Line 132 | Annelida      | <i>Sabellaria spinulosa</i>     | P                      |                            |
| Mooring Line 132 | Annelida      | <i>Spirobranchus sp.</i>        | P                      |                            |
| Mooring Line 132 | Arthropoda    | Balanioidea                     | P                      |                            |
| Mooring Line 132 | Arthropoda    | Brachyura                       | 1                      |                            |
| Mooring Line 132 | Arthropoda    | <i>Cancer pagurus</i>           | 12                     |                            |
| Mooring Line 132 | Arthropoda    | Galatheaidea                    | 3                      |                            |
| Mooring Line 132 | Arthropoda    | <i>Homarus sp.</i>              | 1                      |                            |
| Mooring Line 132 | Arthropoda    | Inachidae                       | 1                      |                            |
| Mooring Line 132 | Arthropoda    | <i>Lithodes maja</i>            | 4                      |                            |
| Mooring Line 132 | Arthropoda    | <i>Munida sp.</i>               | 34                     |                            |
| Mooring Line 132 | Arthropoda    | <i>Necora puber</i>             | 1                      |                            |
| Mooring Line 132 | Arthropoda    | Paguridae                       | 331                    |                            |
| Mooring Line 132 | Arthropoda    | <i>Pagurus prideaux</i>         | 5                      |                            |
| Mooring Line 132 | Arthropoda    | Palaemonidae                    | P                      |                            |
| Mooring Line 132 | Bryozoa       | <i>Alcyonidium sp.</i>          | P                      |                            |
| Mooring Line 132 | Chordata      | <i>Callionymus sp.</i>          | P                      |                            |
| Mooring Line 132 | Chordata      | Gadidae                         | P                      |                            |
| Mooring Line 132 | Chordata      | <i>Gadus morhua</i>             | P                      |                            |
| Mooring Line 132 | Chordata      | <i>Melanogrammus aeglefinus</i> | P                      |                            |
| Mooring Line 132 | Chordata      | <i>Merlangius merlangus</i>     | P                      |                            |
| Mooring Line 132 | Chordata      | <i>Pleuronectes platessa</i>    | P                      |                            |
| Mooring Line 132 | Chordata      | Pleuronectiformes               | P                      |                            |
| Mooring Line 132 | Chordata      | Scorpaeniformes                 | P                      |                            |
| Mooring Line 132 | Chordata      | <i>Solea sp.</i>                | P                      |                            |
| Mooring Line 132 | Chordata      | Triglidae                       | P                      |                            |

**Supplementary table S1.** List with identified taxa, structure, and quantity.

| STRUCTURE        | PHYLUM        | TAXA                            | QUANTITY/ PRESENCE (P) | COMMENTS                                                                               |
|------------------|---------------|---------------------------------|------------------------|----------------------------------------------------------------------------------------|
| Mooring Line 132 | Chordata      | <i>Trisopterus sp.</i>          | P                      |                                                                                        |
| Mooring Line 132 | Chordata      | <i>Trisopterus luscus</i>       | P                      |                                                                                        |
| Mooring Line 132 | Cnidaria      | Actiniaria                      | P                      |                                                                                        |
| Mooring Line 132 | Cnidaria      | <i>Adamsia sp.</i>              | P                      |                                                                                        |
| Mooring Line 132 | Cnidaria      | <i>Alcyonium digitatum</i>      | P                      |                                                                                        |
| Mooring Line 132 | Cnidaria      | Hydrozoa                        | P                      |                                                                                        |
| Mooring Line 132 | Cnidaria      | <i>Kirchenpaueria sp.</i>       | P                      |                                                                                        |
| Mooring Line 132 | Cnidaria      | <i>Metridium senile</i>         | P                      |                                                                                        |
| Mooring Line 132 | Cnidaria      | <i>Nemertesia sp.</i>           | P                      |                                                                                        |
| Mooring Line 132 | Cnidaria      | <i>Nemertesia ramosa</i>        | P                      |                                                                                        |
| Mooring Line 132 | Cnidaria      | <i>Sagartia sp.</i>             | P                      |                                                                                        |
| Mooring Line 132 | Cnidaria      | <i>Urticina sp.</i>             | P                      |                                                                                        |
| Mooring Line 132 | Cnidaria      | <i>Virgularia sp.</i>           | P                      |                                                                                        |
| Mooring Line 132 | Echinodermata | <i>Asterias rubens</i>          | 408                    |                                                                                        |
| Mooring Line 132 | Echinodermata | Asteroidea                      | 5                      |                                                                                        |
| Mooring Line 132 | Echinodermata | <i>Astropecten irregularis</i>  | 2                      |                                                                                        |
| Mooring Line 132 | Echinodermata | <i>Echinus sp.</i>              | 2                      |                                                                                        |
| Mooring Line 132 | Echinodermata | <i>Henricia sp.</i>             | 1                      |                                                                                        |
| Mooring Line 132 | Echinodermata | <i>Leptasterias sp.</i>         | 1                      |                                                                                        |
| Mooring Line 132 | Echinodermata | <i>Luidia sp.</i>               | 2                      |                                                                                        |
| Mooring Line 132 | Echinodermata | <i>Luidia ciliaris</i>          | 3                      |                                                                                        |
| Mooring Line 132 | Echinodermata | <i>Luidia sarsii</i>            | 8                      |                                                                                        |
| Mooring Line 132 | Echinodermata | <i>Stichasterella sp.</i>       | 4                      |                                                                                        |
| Mooring Line 132 | Mollusca      | <i>Calliostoma sp.</i>          | 1                      |                                                                                        |
| Mooring Line 132 | Mollusca      | Cephalopoda eggs                | P                      |                                                                                        |
| Mooring Line 132 | Mollusca      | Nudibranch eggs                 | P                      |                                                                                        |
| Mooring Line 132 | Mollusca      | Sepioidea                       | P                      |                                                                                        |
| Mooring Line 133 | Annelida      | <i>Filograna sp.</i>            | P                      | The Top Chain was excluded from priority structures post survey. Thus, no enumeration. |
| Mooring Line 133 | Annelida      | <i>Sabella sp.</i>              | P                      | The Top Chain was excluded from priority structures post survey. Thus, no enumeration. |
| Mooring Line 133 | Annelida      | <i>Sabellaria spinulosa</i>     | P                      | The Top Chain was excluded from priority structures post survey. Thus, no enumeration. |
| Mooring Line 133 | Annelida      | <i>Spirobranchus sp.</i>        | P                      | The Top Chain was excluded from priority structures post survey. Thus, no enumeration. |
| Mooring Line 133 | Arthropoda    | Balanoidea                      | P                      | The Top Chain was excluded from priority structures post survey. Thus, no enumeration. |
| Mooring Line 133 | Arthropoda    | <i>Cancer pagurus</i>           | 6                      | The Top Chain was excluded from priority structures post survey. Thus, no enumeration. |
| Mooring Line 133 | Arthropoda    | Galatheoidea                    | 4                      | The Top Chain was excluded from priority structures post survey. Thus, no enumeration. |
| Mooring Line 133 | Arthropoda    | <i>Homarus sp.</i>              | 1                      | The Top Chain was excluded from priority structures post survey. Thus, no enumeration. |
| Mooring Line 133 | Arthropoda    | <i>Lithodes maja</i>            | 4                      | The Top Chain was excluded from priority structures post survey. Thus, no enumeration. |
| Mooring Line 133 | Arthropoda    | <i>Munida sp.</i>               | 12                     | The Top Chain was excluded from priority structures post survey. Thus, no enumeration. |
| Mooring Line 133 | Arthropoda    | Paguridae                       | 163                    | The Top Chain was excluded from priority structures post survey. Thus, no enumeration. |
| Mooring Line 133 | Arthropoda    | <i>Pagurus prideaux</i>         | 6                      | The Top Chain was excluded from priority structures post survey. Thus, no enumeration. |
| Mooring Line 133 | Bryozoa       | Bryozoa                         | P                      | The Top Chain was excluded from priority structures post survey. Thus, no enumeration. |
| Mooring Line 133 | Chordata      | Gadidae                         | P                      | The Top Chain was excluded from priority structures post survey. Thus, no enumeration. |
| Mooring Line 133 | Chordata      | <i>Melanogrammus aeglefinus</i> | P                      | The Top Chain was excluded from priority structures post survey. Thus, no enumeration. |
| Mooring Line 133 | Chordata      | <i>Merlangius merlangus</i>     | P                      | The Top Chain was excluded from priority structures post survey. Thus, no enumeration. |
| Mooring Line 133 | Chordata      | <i>Pleuronectes platessa</i>    | P                      | The Top Chain was excluded from priority structures post survey. Thus, no enumeration. |
| Mooring Line 133 | Chordata      | <i>Pleuronectiformes</i>        | P                      | The Top Chain was excluded from priority structures post survey. Thus, no enumeration. |
| Mooring Line 133 | Chordata      | <i>Scomber scomber</i>          | P                      | The Top Chain was excluded from priority structures post survey. Thus, no enumeration. |
| Mooring Line 133 | Chordata      | <i>Trisopterus sp.</i>          | P                      | The Top Chain was excluded from priority structures post survey. Thus, no enumeration. |
| Mooring Line 133 | Chordata      | <i>Trisopterus luscus</i>       | P                      | The Top Chain was excluded from priority structures post survey. Thus, no enumeration. |
| Mooring Line 133 | Cnidaria      | Actiniaria                      | P                      | The Top Chain was excluded from priority structures post survey. Thus, no enumeration. |
| Mooring Line 133 | Cnidaria      | <i>Adamsia sp.</i>              | P                      | The Top Chain was excluded from priority structures post survey. Thus, no enumeration. |
| Mooring Line 133 | Cnidaria      | <i>Alcyonium digitatum</i>      | P                      | The Top Chain was excluded from priority structures post survey. Thus, no enumeration. |
| Mooring Line 133 | Cnidaria      | <i>Ectopleura larynx</i>        | P                      | The Top Chain was excluded from priority structures post survey. Thus, no enumeration. |
| Mooring Line 133 | Cnidaria      | Hydrozoa                        | P                      | The Top Chain was excluded from priority structures post survey. Thus, no enumeration. |
| Mooring Line 133 | Cnidaria      | <i>Kirchenpaueria sp.</i>       | P                      | The Top Chain was excluded from priority structures post survey. Thus, no enumeration. |
| Mooring Line 133 | Cnidaria      | <i>Metridium senile</i>         | P                      | The Top Chain was excluded from priority structures post survey. Thus, no enumeration. |
| Mooring Line 133 | Cnidaria      | <i>Nemertesia sp.</i>           | P                      | The Top Chain was excluded from priority structures post survey. Thus, no enumeration. |
| Mooring Line 133 | Cnidaria      | <i>Tubularia sp.</i>            | P                      | The Top Chain was excluded from priority structures post survey. Thus, no enumeration. |
| Mooring Line 133 | Cnidaria      | <i>Tubularia indivisa</i>       | P                      | The Top Chain was excluded from priority structures post survey. Thus, no enumeration. |
| Mooring Line 133 | Cnidaria      | <i>Urticina sp.</i>             | P                      | The Top Chain was excluded from priority structures post survey. Thus, no enumeration. |
| Mooring Line 133 | Echinodermata | <i>Asterias rubens</i>          | 84                     | The Top Chain was excluded from priority structures post survey. Thus, no enumeration. |
| Mooring Line 133 | Echinodermata | Asteroidea                      | 116                    | The Top Chain was excluded from priority structures post survey. Thus, no enumeration. |

**Supplementary table S1.** List with identified taxa, structure, and quantity.

| STRUCTURE        | PHYLUM        | TAXA                            | QUANTITY/ PRESENCE (P) | COMMENTS                                                                               |
|------------------|---------------|---------------------------------|------------------------|----------------------------------------------------------------------------------------|
| Mooring Line 133 | Echinodermata | <i>Astropecten irregularis</i>  | 1                      | The Top Chain was excluded from priority structures post survey. Thus, no enumeration. |
| Mooring Line 133 | Echinodermata | Echinidea                       | 18                     | The Top Chain was excluded from priority structures post survey. Thus, no enumeration. |
| Mooring Line 133 | Echinodermata | <i>Echinus</i> sp.              | 1                      | The Top Chain was excluded from priority structures post survey. Thus, no enumeration. |
| Mooring Line 133 | Echinodermata | <i>Hippasteria phrygiana</i>    | 1                      | The Top Chain was excluded from priority structures post survey. Thus, no enumeration. |
| Mooring Line 133 | Echinodermata | <i>Luidia ciliaris</i>          | 1                      | The Top Chain was excluded from priority structures post survey. Thus, no enumeration. |
| Mooring Line 133 | Mollusca      | <i>Calliostoma</i> sp.          | 4                      | The Top Chain was excluded from priority structures post survey. Thus, no enumeration. |
| Mooring Line 133 | Mollusca      | Cephalopoda eggs                | P                      | The Top Chain was excluded from priority structures post survey. Thus, no enumeration. |
| Mooring Line 133 | Mollusca      | <i>Loligo vulgaris</i>          | P                      | The Top Chain was excluded from priority structures post survey. Thus, no enumeration. |
| Mooring Line 133 | Mollusca      | <i>Octopus vulgaris</i>         | P                      | The Top Chain was excluded from priority structures post survey. Thus, no enumeration. |
| Mooring Line 133 | Rhodophyta    | Rhodophyta                      | P                      | The Top Chain was excluded from priority structures post survey. Thus, no enumeration. |
| Mooring Line 141 | Annelida      | <i>Filograna</i> sp.            | P                      |                                                                                        |
| Mooring Line 141 | Annelida      | <i>Sabella</i> sp.              | P                      |                                                                                        |
| Mooring Line 141 | Annelida      | <i>Sabellaria spinulosa</i>     | P                      |                                                                                        |
| Mooring Line 141 | Annelida      | <i>Spirobranchus</i> sp.        | P                      |                                                                                        |
| Mooring Line 141 | Arthropoda    | Balanoidea                      | P                      |                                                                                        |
| Mooring Line 141 | Arthropoda    | <i>Cancer pagurus</i>           | 7                      |                                                                                        |
| Mooring Line 141 | Arthropoda    | Galatheaidea                    | 11                     |                                                                                        |
| Mooring Line 141 | Arthropoda    | <i>Lithodes maja</i>            | 8                      |                                                                                        |
| Mooring Line 141 | Arthropoda    | <i>Munida</i> sp.               | 1                      |                                                                                        |
| Mooring Line 141 | Arthropoda    | Paguridae                       | 81                     |                                                                                        |
| Mooring Line 141 | Bryozoa       | <i>Flustra foliacea</i>         | P                      |                                                                                        |
| Mooring Line 141 | Chordata      | Gadidae                         | P                      |                                                                                        |
| Mooring Line 141 | Chordata      | <i>Melanogrammus aeglefinus</i> | P                      |                                                                                        |
| Mooring Line 141 | Chordata      | <i>Merlangius merlangus</i>     | P                      |                                                                                        |
| Mooring Line 141 | Chordata      | <i>Molva molva</i>              | P                      |                                                                                        |
| Mooring Line 141 | Chordata      | <i>Pleuronectiformes</i>        | P                      |                                                                                        |
| Mooring Line 141 | Chordata      | <i>Sebastes</i> sp.             | P                      |                                                                                        |
| Mooring Line 141 | Chordata      | <i>Trisopterus</i> sp.          | P                      |                                                                                        |
| Mooring Line 141 | Cnidaria      | <i>Alcyonium digitatum</i>      | P                      |                                                                                        |
| Mooring Line 141 | Cnidaria      | <i>Ectopleura larynx</i>        | P                      |                                                                                        |
| Mooring Line 141 | Cnidaria      | Hydrozoa                        | P                      |                                                                                        |
| Mooring Line 141 | Cnidaria      | <i>Metridium senile</i>         | P                      |                                                                                        |
| Mooring Line 141 | Cnidaria      | <i>Nemertesia ramosa</i>        | P                      |                                                                                        |
| Mooring Line 141 | Cnidaria      | <i>Tubularia</i> sp.            | P                      |                                                                                        |
| Mooring Line 141 | Cnidaria      | <i>Tubularia indivisa</i>       | P                      |                                                                                        |
| Mooring Line 141 | Cnidaria      | <i>Urticina</i> sp.             | P                      |                                                                                        |
| Mooring Line 141 | Echinodermata | <i>Asterias rubens</i>          | 79                     |                                                                                        |
| Mooring Line 141 | Echinodermata | Asteroidea                      | 832                    | Potentially underestimated                                                             |
| Mooring Line 141 | Echinodermata | Echinidea                       | 204                    | Potentially underestimated                                                             |
| Mooring Line 141 | Echinodermata | <i>Echinus</i> sp.              | 10                     |                                                                                        |
| Mooring Line 141 | Echinodermata | <i>Luidia</i> sp.               | P                      |                                                                                        |
| Mooring Line 141 | Echinodermata | Ophiuroidea                     | P                      |                                                                                        |
| Mooring Line 141 | Echinodermata | <i>Stichastrella</i> sp.        | 1                      |                                                                                        |
| Mooring Line 141 | Mollusca      | Cephalopoda eggs                | P                      |                                                                                        |
| Mooring Line 141 | Mollusca      | Nudibranch eggs                 | P                      |                                                                                        |
| Mooring Line 141 | Rhodophyta    | Rhodophyta                      | P                      |                                                                                        |
| Mooring Line 142 | Annelida      | <i>Filograna</i> sp.            | P                      |                                                                                        |
| Mooring Line 142 | Annelida      | <i>Sabella</i> sp.              | P                      |                                                                                        |
| Mooring Line 142 | Annelida      | <i>Sabellaria spinulosa</i>     | P                      |                                                                                        |
| Mooring Line 142 | Annelida      | <i>Spirobranchus</i> sp.        | P                      |                                                                                        |
| Mooring Line 142 | Arthropoda    | Balanoidea                      | P                      |                                                                                        |
| Mooring Line 142 | Arthropoda    | <i>Cancer pagurus</i>           | 19                     |                                                                                        |
| Mooring Line 142 | Arthropoda    | Galatheaidea                    | 30                     |                                                                                        |
| Mooring Line 142 | Arthropoda    | <i>Hyas</i> sp.                 | 1                      |                                                                                        |
| Mooring Line 142 | Arthropoda    | <i>Lithodes maja</i>            | 9                      |                                                                                        |
| Mooring Line 142 | Arthropoda    | <i>Munida</i> sp.               | 21                     |                                                                                        |
| Mooring Line 142 | Arthropoda    | <i>Necora puber</i>             | 4                      |                                                                                        |
| Mooring Line 142 | Arthropoda    | Paguridae                       | 92                     |                                                                                        |
| Mooring Line 142 | Arthropoda    | Palaemonidae                    | P                      |                                                                                        |
| Mooring Line 142 | Chordata      | Gadidae                         | P                      |                                                                                        |
| Mooring Line 142 | Chordata      | <i>Melanogrammus aeglefinus</i> | P                      |                                                                                        |
| Mooring Line 142 | Chordata      | <i>Pleuronectiformes</i>        | P                      |                                                                                        |
| Mooring Line 142 | Chordata      | Scorpaeniformes                 | P                      |                                                                                        |
| Mooring Line 142 | Chordata      | <i>Trisopterus luscus</i>       | P                      |                                                                                        |
| Mooring Line 142 | Cnidaria      | <i>Alcyonium digitatum</i>      | P                      |                                                                                        |
| Mooring Line 142 | Cnidaria      | <i>Ectopleura larynx</i>        | P                      |                                                                                        |
| Mooring Line 142 | Cnidaria      | Hydrozoa                        | P                      |                                                                                        |
| Mooring Line 142 | Cnidaria      | <i>Metridium senile</i>         | P                      |                                                                                        |
| Mooring Line 142 | Cnidaria      | <i>Nemertesia</i> sp.           | P                      |                                                                                        |
| Mooring Line 142 | Cnidaria      | <i>Tubularia indivisa</i>       | P                      |                                                                                        |
| Mooring Line 142 | Cnidaria      | <i>Urticina</i> sp.             | P                      |                                                                                        |
| Mooring Line 142 | Echinodermata | <i>Asterias rubens</i>          | 71                     |                                                                                        |
| Mooring Line 142 | Echinodermata | Asteroidea                      | 343                    | Potentially underestimated                                                             |
| Mooring Line 142 | Echinodermata | Echinidea                       | 200                    | Potentially underestimated                                                             |

**Supplementary table S1.** List with identified taxa, structure, and quantity.

| STRUCTURE        | PHYLUM        | TAXA                            | QUANTITY/ PRESENCE (P) | COMMENTS                   |
|------------------|---------------|---------------------------------|------------------------|----------------------------|
| Mooring Line 142 | Echinodermata | <i>Echinus</i> sp.              | 2                      |                            |
| Mooring Line 142 | Echinodermata | <i>Henricia</i> sp.             | 1                      |                            |
| Mooring Line 142 | Echinodermata | <i>Luidia</i> sp.               | P                      |                            |
| Mooring Line 142 | Echinodermata | <i>Ophiura</i> sp.              | P                      |                            |
| Mooring Line 142 | Mollusca      | Cephalopoda eggs                | P                      |                            |
| Mooring Line 142 | Mollusca      | <i>Loligo vulgaris</i>          | P                      |                            |
| Mooring Line 143 | Annelida      | <i>Filograna</i> sp.            | P                      |                            |
| Mooring Line 143 | Annelida      | <i>Sabellaria spinulosa</i>     | P                      |                            |
| Mooring Line 143 | Annelida      | <i>Spirobranchus</i> sp.        | P                      |                            |
| Mooring Line 143 | Arthropoda    | Balanoidea                      | P                      |                            |
| Mooring Line 143 | Arthropoda    | <i>Cancer pagurus</i>           | 5                      |                            |
| Mooring Line 143 | Arthropoda    | Galatheaidea                    | 7                      |                            |
| Mooring Line 143 | Arthropoda    | <i>Lithodes maja</i>            | 13                     |                            |
| Mooring Line 143 | Arthropoda    | <i>Munida</i> sp.               | 11                     |                            |
| Mooring Line 143 | Arthropoda    | Paguridae                       | 17                     |                            |
| Mooring Line 143 | Chordata      | <i>Melanogrammus aeglefinus</i> | P                      |                            |
| Mooring Line 143 | Chordata      | <i>Molva molva</i>              | P                      |                            |
| Mooring Line 143 | Chordata      | Pleuronectiformes               | P                      |                            |
| Mooring Line 143 | Chordata      | Scorpaeniformes                 | P                      |                            |
| Mooring Line 143 | Chordata      | <i>Trisopterus luscus</i>       | P                      |                            |
| Mooring Line 143 | Cnidaria      | <i>Alcyonium digitatum</i>      | P                      |                            |
| Mooring Line 143 | Cnidaria      | <i>Ectopleura larynx</i>        | P                      |                            |
| Mooring Line 143 | Cnidaria      | Hydrozoa                        | P                      |                            |
| Mooring Line 143 | Cnidaria      | <i>Kirchenpaueria</i> sp.       | P                      |                            |
| Mooring Line 143 | Cnidaria      | <i>Metridium senile</i>         | P                      |                            |
| Mooring Line 143 | Cnidaria      | <i>Nemertesia</i> sp.           | P                      |                            |
| Mooring Line 143 | Cnidaria      | <i>Tubularia indivisa</i>       | P                      |                            |
| Mooring Line 143 | Cnidaria      | <i>Urticina</i> sp.             | P                      |                            |
| Mooring Line 143 | Echinodermata | <i>Asterias rubens</i>          | 153                    |                            |
| Mooring Line 143 | Echinodermata | Asteroidea                      | 403                    |                            |
| Mooring Line 143 | Echinodermata | Echinidea                       | 24                     |                            |
| Mooring Line 143 | Echinodermata | <i>Echinus</i> sp.              | 7                      |                            |
| Mooring Line 143 | Echinodermata | <i>Hippasteria phrygiana</i>    | P                      |                            |
| Mooring Line 143 | Echinodermata | <i>Luidia</i> sp.               | P                      |                            |
| Mooring Line 143 | Echinodermata | <i>Luidia sarsii</i>            | P                      |                            |
| Mooring Line 143 | Mollusca      | Cephalopoda eggs                | P                      |                            |
| Mooring Line 143 | Mollusca      | Nudibranch eggs                 | P                      |                            |
| Mooring Line 143 | Mollusca      | Nudibranchia                    | 2                      |                            |
| Mooring Line 143 | Rhodophyta    | Rhodophyta                      | P                      |                            |
| Mooring Line 151 | Cnidaria      | Actiniaria                      | P                      |                            |
| Mooring Line 151 | Bryozoa       | <i>Alcyonidium</i> sp.          | P                      |                            |
| Mooring Line 151 | Cnidaria      | <i>Alcyonium digitatum</i>      | P                      |                            |
| Mooring Line 151 | Echinodermata | <i>Asterias rubens</i>          | 197                    |                            |
| Mooring Line 151 | Echinodermata | Asteroidea                      | 560                    | Potentially underestimated |
| Mooring Line 151 | Arthropoda    | Balanoidea                      | P                      |                            |
| Mooring Line 151 | Arthropoda    | Brachyura                       | 2                      |                            |
| Mooring Line 151 | Mollusca      | <i>Calliostoma</i> sp.          | 3                      |                            |
| Mooring Line 151 | Arthropoda    | <i>Cancer pagurus</i>           | 13                     |                            |
| Mooring Line 151 | Mollusca      | Cephalopoda eggs                | P                      |                            |
| Mooring Line 151 | Echinodermata | Echinoidea                      | 2                      |                            |
| Mooring Line 151 | Echinodermata | <i>Echinus</i> sp.              | 1                      |                            |
| Mooring Line 151 | Chordata      | Gadidae                         | P                      |                            |
| Mooring Line 151 | Chordata      | <i>Gadus morhua</i>             | P                      |                            |
| Mooring Line 151 | Arthropoda    | Galatheaidea                    | 5                      |                            |
| Mooring Line 151 | Echinodermata | <i>Henricia</i> sp.             | 1                      |                            |
| Mooring Line 151 | Echinodermata | <i>Hippasteria phrygiana</i>    | 1                      |                            |
| Mooring Line 151 | Arthropoda    | <i>Homarus</i> sp.              | 1                      |                            |
| Mooring Line 151 | Arthropoda    | <i>Hyas</i> sp.                 | 1                      |                            |
| Mooring Line 151 | Cnidaria      | Hydrozoa                        | P                      |                            |
| Mooring Line 151 | Arthropoda    | Inachidae                       | 3                      |                            |
| Mooring Line 151 | Cnidaria      | <i>Kirchenpaueria</i> sp.       | P                      |                            |
| Mooring Line 151 | Arthropoda    | <i>Lithodes maja</i>            | 19                     |                            |
| Mooring Line 151 | Mollusca      | <i>Loligo vulgaris</i>          | P                      |                            |
| Mooring Line 151 | Echinodermata | <i>Luidia ciliaris</i>          | 2                      |                            |
| Mooring Line 151 | Chordata      | <i>Melanogrammus aeglefinus</i> | P                      |                            |
| Mooring Line 151 | Cnidaria      | <i>Metridium senile</i>         | P                      |                            |
| Mooring Line 151 | Chordata      | <i>Molva molva</i>              | P                      |                            |
| Mooring Line 151 | Arthropoda    | <i>Munida</i> sp.               | 27                     |                            |
| Mooring Line 151 | Arthropoda    | <i>Necora puber</i>             | 2                      |                            |
| Mooring Line 151 | Cnidaria      | <i>Nemertesia ramosa</i>        | P                      |                            |
| Mooring Line 151 | Arthropoda    | Paguridae                       | 525                    |                            |
| Mooring Line 151 | Arthropoda    | Pandalidae                      | 2                      |                            |
| Mooring Line 151 | Chordata      | Pleuronectiformes               | P                      |                            |
| Mooring Line 151 | Chordata      | <i>Pollachius virens</i>        | P                      |                            |
| Mooring Line 151 | Arthropoda    | Pycnogodia                      | 1                      |                            |
| Mooring Line 151 | Annelida      | <i>Sabella</i> sp.              | P                      |                            |
| Mooring Line 151 | Rhodophyta    | Rhodophyta                      | P                      |                            |
| Mooring Line 151 | Annelida      | <i>Sabellaria spinulosa</i>     | P                      |                            |
| Mooring Line 151 | Chordata      | Scorpaeniformes                 | P                      |                            |

Supplementary table S1. List with identified taxa, structure, and quantity.

| STRUCTURE        | PHYLUM        | TAXA                            | QUANTITY/ PRESENCE (P) | COMMENTS                                                             |
|------------------|---------------|---------------------------------|------------------------|----------------------------------------------------------------------|
| Mooring Line 151 | Annelida      | <i>Spirobranchus sp.</i>        | P                      |                                                                      |
| Mooring Line 151 | Chordata      | <i>Trisopterus luscus</i>       | P                      |                                                                      |
| Mooring Line 151 | Cnidaria      | <i>Tubularia sp.</i>            | P                      |                                                                      |
| Mooring Line 151 | Cnidaria      | <i>Tubularia indivisa</i>       | P                      |                                                                      |
| Mooring Line 151 | Cnidaria      | <i>Urticina sp.</i>             | P                      |                                                                      |
| Mooring Line 152 | Annelida      | <i>Sabellaria spinulosa</i>     | P                      | Excluded from priority structures post survey. Thus, no enumeration. |
| Mooring Line 152 | Annelida      | <i>Spirobranchus sp.</i>        | P                      | Excluded from priority structures post survey. Thus, no enumeration. |
| Mooring Line 152 | Arthropoda    | Balanoidea                      | P                      | Excluded from priority structures post survey. Thus, no enumeration. |
| Mooring Line 152 | Arthropoda    | <i>Cancer pagurus</i>           | P                      | Excluded from priority structures post survey. Thus, no enumeration. |
| Mooring Line 152 | Arthropoda    | Galatheaidea                    | P                      | Excluded from priority structures post survey. Thus, no enumeration. |
| Mooring Line 152 | Arthropoda    | <i>Lithodes maja</i>            | P                      | Excluded from priority structures post survey. Thus, no enumeration. |
| Mooring Line 152 | Arthropoda    | <i>Munida sp.</i>               | P                      | Excluded from priority structures post survey. Thus, no enumeration. |
| Mooring Line 152 | Arthropoda    | Paguridae                       | P                      | Excluded from priority structures post survey. Thus, no enumeration. |
| Mooring Line 152 | Arthropoda    | Palaemonidae                    | P                      | Excluded from priority structures post survey. Thus, no enumeration. |
| Mooring Line 152 | Bryozoa       | <i>Alcyonidium sp.</i>          | P                      | Excluded from priority structures post survey. Thus, no enumeration. |
| Mooring Line 152 | Chordata      | Gadidae                         | P                      | Excluded from priority structures post survey. Thus, no enumeration. |
| Mooring Line 152 | Chordata      | <i>Gadus morhua</i>             | P                      | Excluded from priority structures post survey. Thus, no enumeration. |
| Mooring Line 152 | Chordata      | <i>Melanogrammus aeglefinus</i> | P                      | Excluded from priority structures post survey. Thus, no enumeration. |
| Mooring Line 152 | Chordata      | Pleuronectiformes               | P                      | Excluded from priority structures post survey. Thus, no enumeration. |
| Mooring Line 152 | Chordata      | <i>Trisopterus sp.</i>          | P                      | Excluded from priority structures post survey. Thus, no enumeration. |
| Mooring Line 152 | Cnidaria      | <i>Alcyonium digitatum</i>      | P                      | Excluded from priority structures post survey. Thus, no enumeration. |
| Mooring Line 152 | Cnidaria      | Hydrozoa                        | P                      | Excluded from priority structures post survey. Thus, no enumeration. |
| Mooring Line 152 | Cnidaria      | <i>Kirchenpaueria sp.</i>       | P                      | Excluded from priority structures post survey. Thus, no enumeration. |
| Mooring Line 152 | Cnidaria      | <i>Metridium senile</i>         | P                      | Excluded from priority structures post survey. Thus, no enumeration. |
| Mooring Line 152 | Cnidaria      | <i>Nemertesia sp.</i>           | P                      | Excluded from priority structures post survey. Thus, no enumeration. |
| Mooring Line 152 | Cnidaria      | <i>Tubularia sp.</i>            | P                      | Excluded from priority structures post survey. Thus, no enumeration. |
| Mooring Line 152 | Cnidaria      | <i>Tubularia indivisa</i>       | P                      | Excluded from priority structures post survey. Thus, no enumeration. |
| Mooring Line 152 | Cnidaria      | <i>Urticina sp.</i>             | P                      | Excluded from priority structures post survey. Thus, no enumeration. |
| Mooring Line 152 | Echinodermata | <i>Asterias rubens</i>          | P                      | Excluded from priority structures post survey. Thus, no enumeration. |
| Mooring Line 152 | Echinodermata | Asteroidea                      | P                      | Excluded from priority structures post survey. Thus, no enumeration. |
| Mooring Line 152 | Echinodermata | <i>Echinus sp.</i>              | P                      | Excluded from priority structures post survey. Thus, no enumeration. |
| Mooring Line 152 | Echinodermata | <i>Henricia sp.</i>             | P                      | Excluded from priority structures post survey. Thus, no enumeration. |
| Mooring Line 152 | Echinodermata | <i>Luidia sp.</i>               | P                      | Excluded from priority structures post survey. Thus, no enumeration. |
| Mooring Line 152 | Echinodermata | <i>Luidia ciliaris</i>          | P                      | Excluded from priority structures post survey. Thus, no enumeration. |
| Mooring Line 152 | Echinodermata | <i>Stichastrella sp.</i>        | P                      | Excluded from priority structures post survey. Thus, no enumeration. |
| Mooring Line 152 | Mollusca      | Cephalopoda eggs                | P                      | Excluded from priority structures post survey. Thus, no enumeration. |
| Mooring Line 152 | Mollusca      | <i>Loligo vulgaris</i>          | P                      | Excluded from priority structures post survey. Thus, no enumeration. |
| Mooring Line 152 | Mollusca      | Nudibranch eggs                 | P                      | Excluded from priority structures post survey. Thus, no enumeration. |
| Mooring Line 152 | Rhodophyta    | Rhodophyta                      | P                      | Excluded from priority structures post survey. Thus, no enumeration. |
| Mooring Line 153 | Annelida      | <i>Filograna sp.</i>            | P                      |                                                                      |
| Mooring Line 153 | Annelida      | <i>Sabella sp.</i>              | P                      |                                                                      |
| Mooring Line 153 | Annelida      | <i>Sabellaria spinulosa</i>     | P                      |                                                                      |
| Mooring Line 153 | Annelida      | <i>Spirobranchus sp.</i>        | P                      |                                                                      |
| Mooring Line 153 | Arthropoda    | Balanoidea                      | P                      |                                                                      |
| Mooring Line 153 | Arthropoda    | <i>Cancer pagurus</i>           | 10                     |                                                                      |
| Mooring Line 153 | Arthropoda    | Galatheaidea                    | 5                      |                                                                      |
| Mooring Line 153 | Arthropoda    | <i>Hyas sp.</i>                 | 1                      |                                                                      |
| Mooring Line 153 | Arthropoda    | Inachidae                       | 3                      |                                                                      |
| Mooring Line 153 | Arthropoda    | <i>Lithodes maja</i>            | 11                     |                                                                      |
| Mooring Line 153 | Arthropoda    | <i>Munida sp.</i>               | 71                     |                                                                      |
| Mooring Line 153 | Arthropoda    | <i>Necora puber</i>             | 1                      |                                                                      |
| Mooring Line 153 | Arthropoda    | Paguridae                       | 280                    |                                                                      |
| Mooring Line 153 | Arthropoda    | Palaemonidae                    | 48                     |                                                                      |
| Mooring Line 153 | Chordata      | Gadidae                         | P                      |                                                                      |
| Mooring Line 153 | Chordata      | <i>Melanogrammus aeglefinus</i> | P                      |                                                                      |
| Mooring Line 153 | Chordata      | <i>Molva molva</i>              | P                      |                                                                      |
| Mooring Line 153 | Chordata      | Pleuronectiformes               | P                      |                                                                      |
| Mooring Line 153 | Chordata      | Scorpaeniformes                 | P                      |                                                                      |
| Mooring Line 153 | Chordata      | <i>Trisopterus luscus</i>       | P                      |                                                                      |
| Mooring Line 153 | Cnidaria      | <i>Actinothoe sp.</i>           | P                      |                                                                      |
| Mooring Line 153 | Cnidaria      | <i>Alcyonium digitatum</i>      | P                      |                                                                      |
| Mooring Line 153 | Cnidaria      | Hydrozoa                        | P                      |                                                                      |
| Mooring Line 153 | Cnidaria      | <i>Metridium senile</i>         | P                      |                                                                      |
| Mooring Line 153 | Cnidaria      | <i>Nemertesia ramosa</i>        | P                      |                                                                      |
| Mooring Line 153 | Cnidaria      | <i>Tubularia sp.</i>            | P                      |                                                                      |
| Mooring Line 153 | Cnidaria      | <i>Tubularia indivisa</i>       | P                      |                                                                      |
| Mooring Line 153 | Cnidaria      | <i>Urticina sp.</i>             | P                      |                                                                      |
| Mooring Line 153 | Cnidaria      | <i>Virgularia sp.</i>           | P                      |                                                                      |
| Mooring Line 153 | Echinodermata | <i>Asterias rubens</i>          | 276                    |                                                                      |
| Mooring Line 153 | Echinodermata | Asteroidea                      | 181                    |                                                                      |
| Mooring Line 153 | Echinodermata | <i>Astropecten irregularis</i>  | P                      |                                                                      |
| Mooring Line 153 | Echinodermata | Echinidea                       | 40                     |                                                                      |
| Mooring Line 153 | Echinodermata | <i>Echinus sp.</i>              | 2                      |                                                                      |
| Mooring Line 153 | Echinodermata | <i>Henricia sp.</i>             | 1                      |                                                                      |
| Mooring Line 153 | Echinodermata | <i>Luidia ciliaris</i>          | P                      |                                                                      |
| Mooring Line 153 | Echinodermata | <i>Luidia sarsii</i>            | P                      |                                                                      |
| Mooring Line 153 | Mollusca      | <i>Calliostoma sp.</i>          | 17                     |                                                                      |
| Mooring Line 153 | Mollusca      | Cephalopoda eggs                | P                      |                                                                      |
| Mooring Line 153 | Mollusca      | <i>Octopus vulgaris</i>         | P                      |                                                                      |

Supplementary table S1. List with identified taxa, structure, and quantity.

| STRUCTURE        | PHYLUM        | TAXA                         | QUANTITY/ PRESENCE (P) | COMMENTS                                                             |
|------------------|---------------|------------------------------|------------------------|----------------------------------------------------------------------|
| Mooring Line 153 | Mollusca      | Sepioidea                    | P                      |                                                                      |
| Mooring Line 153 | Rhodophyta    | <i>Delesseria sp.</i>        | P                      |                                                                      |
| Mooring Line 153 | Rhodophyta    | Rhodophyta                   | P                      |                                                                      |
| Turbine HS1      | Annelida      | <i>Filograna sp.</i>         | P                      |                                                                      |
| Turbine HS1      | Annelida      | <i>Sabella sp.</i>           | P                      |                                                                      |
| Turbine HS1      | Annelida      | Serpulidae                   | P                      |                                                                      |
| Turbine HS1      | Annelida      | <i>Spirobranchus sp.</i>     | P                      |                                                                      |
| Turbine HS1      | Arthropoda    | Balanoidea                   | P                      |                                                                      |
| Turbine HS1      | Arthropoda    | Brachyura                    | 1                      |                                                                      |
| Turbine HS1      | Arthropoda    | Galatheaidea                 | 62                     |                                                                      |
| Turbine HS1      | Chlorophyta   | <i>Ulva sp.</i>              | P                      |                                                                      |
| Turbine HS1      | Chordata      | Ammodytidae                  | P                      |                                                                      |
| Turbine HS1      | Chordata      | <i>Ascidia mentula</i>       | P                      |                                                                      |
| Turbine HS1      | Chordata      | Tunicata                     | P                      |                                                                      |
| Turbine HS1      | Cnidaria      | Actiniaria                   | P                      |                                                                      |
| Turbine HS1      | Cnidaria      | <i>Actinothoe sp.</i>        | P                      |                                                                      |
| Turbine HS1      | Cnidaria      | <i>Alcyonium digitatum</i>   | P                      |                                                                      |
| Turbine HS1      | Cnidaria      | <i>Ectopleura larynx</i>     | P                      |                                                                      |
| Turbine HS1      | Cnidaria      | <i>Metridium senile</i>      | P                      |                                                                      |
| Turbine HS1      | Cnidaria      | <i>Sagartia sp.</i>          | P                      |                                                                      |
| Turbine HS1      | Cnidaria      | <i>Urticina sp.</i>          | P                      |                                                                      |
| Turbine HS1      | Echinodermata | <i>Asterias rubens</i>       | 273                    |                                                                      |
| Turbine HS1      | Echinodermata | Asteroidea                   | 17                     |                                                                      |
| Turbine HS1      | Echinodermata | Echinidea                    | 697                    | Potentially underestimated                                           |
| Turbine HS1      | Echinodermata | <i>Echinus sp.</i>           | 17                     |                                                                      |
| Turbine HS1      | Mollusca      | <i>Aeolidia papillosa</i>    | 85                     |                                                                      |
| Turbine HS1      | Mollusca      | <i>Mytilus sp.</i>           | P                      |                                                                      |
| Turbine HS1      | Mollusca      | Nudibranch eggs              | P                      |                                                                      |
| Turbine HS1      | Mollusca      | Nudibranchia                 | 1                      |                                                                      |
| Turbine HS1      | Phaeophyceae  | <i>Alaria sp.</i>            | P                      |                                                                      |
| Turbine HS1      | Phaeophyceae  | <i>Desmarestia sp.</i>       | P                      |                                                                      |
| Turbine HS1      | Phaeophyceae  | <i>Laminaria sp.</i>         | P                      |                                                                      |
| Turbine HS1      | Phaeophyceae  | Phaeophyceae                 | P                      |                                                                      |
| Turbine HS1      | Rhodophyta    | Rhodophyta                   | P                      |                                                                      |
| Turbine HS2      | Annelida      | Serpulidae                   | P                      |                                                                      |
| Turbine HS2      | Annelida      | <i>Spirobranchus sp.</i>     | P                      |                                                                      |
| Turbine HS2      | Arthropoda    | Balanoidea                   | P                      |                                                                      |
| Turbine HS2      | Arthropoda    | Balanoidea                   | P                      |                                                                      |
| Turbine HS2      | Arthropoda    | <i>Cancer pagurus</i>        | 4                      |                                                                      |
| Turbine HS2      | Arthropoda    | Galatheaidea                 | 36                     |                                                                      |
| Turbine HS2      | Arthropoda    | <i>Hyas sp.</i>              | 3                      |                                                                      |
| Turbine HS2      | Chlorophyta   | <i>Ulva sp.</i>              | P                      |                                                                      |
| Turbine HS2      | Chordata      | <i>Ascidia mentula</i>       | P                      |                                                                      |
| Turbine HS2      | Chordata      | <i>Gobiusculus sp.</i>       | P                      |                                                                      |
| Turbine HS2      | Cnidaria      | <i>Actinothoe sp.</i>        | P                      |                                                                      |
| Turbine HS2      | Cnidaria      | <i>Aiptasiogeton sp.</i>     | P                      |                                                                      |
| Turbine HS2      | Cnidaria      | <i>Alcyonium digitatum</i>   | P                      |                                                                      |
| Turbine HS2      | Cnidaria      | <i>Ectopleura larynx</i>     | P                      |                                                                      |
| Turbine HS2      | Cnidaria      | <i>Metridium senile</i>      | P                      |                                                                      |
| Turbine HS2      | Cnidaria      | <i>Sagartia sp.</i>          | P                      |                                                                      |
| Turbine HS2      | Cnidaria      | <i>Tubularia sp.</i>         | P                      |                                                                      |
| Turbine HS2      | Cnidaria      | <i>Urticina sp.</i>          | P                      |                                                                      |
| Turbine HS2      | Echinodermata | <i>Asterias rubens</i>       | 28                     |                                                                      |
| Turbine HS2      | Echinodermata | Asteroidea                   | 144                    | Potentially underestimated                                           |
| Turbine HS2      | Echinodermata | Echinidea                    | 154                    | Potentially underestimated                                           |
| Turbine HS2      | Echinodermata | <i>Echinus sp.</i>           | 5                      |                                                                      |
| Turbine HS2      | Echinodermata | <i>Henricia sp.</i>          | 1                      |                                                                      |
| Turbine HS2      | Mollusca      | <i>Aeolidia papillosa</i>    | 19                     |                                                                      |
| Turbine HS2      | Mollusca      | <i>Mytilus sp.</i>           | P                      |                                                                      |
| Turbine HS2      | Mollusca      | Nudibranch eggs              | P                      |                                                                      |
| Turbine HS2      | Phaeophyceae  | <i>Alaria sp.</i>            | P                      |                                                                      |
| Turbine HS2      | Phaeophyceae  | <i>Laminaria sp.</i>         | P                      |                                                                      |
| Turbine HS2      | Phaeophyceae  | Phaeophyceae                 | P                      |                                                                      |
| Turbine HS2      | Rhodophyta    | <i>Calliblepharis jubata</i> | P                      |                                                                      |
| Turbine HS2      | Rhodophyta    | <i>Delesseria sp.</i>        | P                      |                                                                      |
| Turbine HS2      | Rhodophyta    | Rhodophyta                   | P                      |                                                                      |
| Turbine HS3      | Annelida      | <i>Spirobranchus sp.</i>     | P                      | Excluded from priority structures post survey. Thus, no enumeration. |
| Turbine HS3      | Arthropoda    | Balanoidea                   | P                      | Excluded from priority structures post survey. Thus, no enumeration. |
| Turbine HS3      | Cnidaria      | Actiniaria                   | P                      | Excluded from priority structures post survey. Thus, no enumeration. |
| Turbine HS3      | Cnidaria      | <i>Ectopleura larynx</i>     | P                      | Excluded from priority structures post survey. Thus, no enumeration. |
| Turbine HS3      | Cnidaria      | Hydrozoa                     | P                      | Excluded from priority structures post survey. Thus, no enumeration. |
| Turbine HS3      | Cnidaria      | <i>Metridium senile</i>      | P                      | Excluded from priority structures post survey. Thus, no enumeration. |
| Turbine HS3      | Cnidaria      | <i>Tubularia sp.</i>         | P                      | Excluded from priority structures post survey. Thus, no enumeration. |
| Turbine HS3      | Cnidaria      | <i>Urticina sp.</i>          | P                      | Excluded from priority structures post survey. Thus, no enumeration. |
| Turbine HS3      | Echinodermata | <i>Asterias rubens</i>       | P                      | Excluded from priority structures post survey. Thus, no enumeration. |
| Turbine HS3      | Echinodermata | Asteroidea                   | P                      | Excluded from priority structures post survey. Thus, no enumeration. |
| Turbine HS3      | Echinodermata | Echinidea                    | P                      | Excluded from priority structures post survey. Thus, no enumeration. |
| Turbine HS3      | Echinodermata | <i>Echinus sp.</i>           | P                      | Excluded from priority structures post survey. Thus, no enumeration. |
| Turbine HS3      | Mollusca      | Nudibranch eggs              | P                      | Excluded from priority structures post survey. Thus, no enumeration. |



**Supplementary table S1.** List with identified taxa, structure, and quantity.

| STRUCTURE   | PHYLUM        | TAXA                            | QUANTITY/ PRESENCE (P) | COMMENTS                                                             |
|-------------|---------------|---------------------------------|------------------------|----------------------------------------------------------------------|
| Turbine HS3 | Phaeophyceae  | <i>Laminaria sp.</i>            | P                      | Excluded from priority structures post survey. Thus, no enumeration. |
| Turbine HS3 | Phaeophyceae  | Phaeophyceae                    | P                      | Excluded from priority structures post survey. Thus, no enumeration. |
| Turbine HS3 | Rhodophyta    | Rhodophyta                      | P                      | Excluded from priority structures post survey. Thus, no enumeration. |
| Turbine HS4 | Annelida      | <i>Sabella sp.</i>              | P                      |                                                                      |
| Turbine HS4 | Annelida      | <i>Spirobranchus sp.</i>        | P                      |                                                                      |
| Turbine HS4 | Arthropoda    | Balanoidea                      | P                      |                                                                      |
| Turbine HS4 | Arthropoda    | Balanoidea                      | P                      |                                                                      |
| Turbine HS4 | Arthropoda    | <i>Cancer pagurus</i>           | 3                      |                                                                      |
| Turbine HS4 | Arthropoda    | Galatheaidea                    | 45                     |                                                                      |
| Turbine HS4 | Arthropoda    | <i>Liocarcinus sp.</i>          | 1                      |                                                                      |
| Turbine HS4 | Chlorophyta   | <i>Ulva sp.</i>                 | P                      |                                                                      |
| Turbine HS4 | Chordata      | Ammodytidae                     | P                      |                                                                      |
| Turbine HS4 | Chordata      | Tunicata                        | P                      |                                                                      |
| Turbine HS4 | Cnidaria      | Actiniaria                      | P                      |                                                                      |
| Turbine HS4 | Cnidaria      | <i>Alcyonium digitatum</i>      | P                      |                                                                      |
| Turbine HS4 | Cnidaria      | <i>Ectopleura larynx</i>        | P                      |                                                                      |
| Turbine HS4 | Cnidaria      | <i>Metridium senile</i>         | P                      |                                                                      |
| Turbine HS4 | Cnidaria      | <i>Sagartia sp.</i>             | P                      |                                                                      |
| Turbine HS4 | Cnidaria      | <i>Tubularia sp.</i>            | P                      |                                                                      |
| Turbine HS4 | Cnidaria      | <i>Urticina sp.</i>             | P                      |                                                                      |
| Turbine HS4 | Echinodermata | <i>Asterias rubens</i>          | 124                    |                                                                      |
| Turbine HS4 | Echinodermata | Asteroidea                      | 54                     |                                                                      |
| Turbine HS4 | Echinodermata | Echinidea                       | 458                    | Potentially underestimated                                           |
| Turbine HS4 | Echinodermata | <i>Echinus sp.</i>              | 10                     |                                                                      |
| Turbine HS4 | Mollusca      | <i>Aeolidia papillosa</i>       | 34                     |                                                                      |
| Turbine HS4 | Mollusca      | <i>Mytilus sp.</i>              | P                      |                                                                      |
| Turbine HS4 | Mollusca      | Nudibranch eggs                 | P                      |                                                                      |
| Turbine HS4 | Phaeophyceae  | <i>Alaria sp.</i>               | P                      |                                                                      |
| Turbine HS4 | Phaeophyceae  | <i>Laminaria sp.</i>            | P                      |                                                                      |
| Turbine HS4 | Phaeophyceae  | Phaeophyceae                    | P                      |                                                                      |
| Turbine HS4 | Rhodophyta    | Rhodophyta                      | P                      |                                                                      |
| Turbine HS5 | Annelida      | <i>Sabella sp.</i>              | P                      |                                                                      |
| Turbine HS5 | Annelida      | <i>Spirobranchus sp.</i>        | P                      |                                                                      |
| Turbine HS5 | Arthropoda    | Balanoidea                      | P                      |                                                                      |
| Turbine HS5 | Arthropoda    | Brachyura                       | 1                      |                                                                      |
| Turbine HS5 | Arthropoda    | <i>Cancer pagurus</i>           | 1                      |                                                                      |
| Turbine HS5 | Arthropoda    | Galatheaidea                    | 11                     |                                                                      |
| Turbine HS5 | Arthropoda    | <i>Necora puber</i>             | 1                      |                                                                      |
| Turbine HS5 | Bryozoa       | Bryozoa                         | P                      |                                                                      |
| Turbine HS5 | Bryozoa       | <i>Membranipora sp.</i>         | P                      |                                                                      |
| Turbine HS5 | Bryozoa       | <i>Omalosecosa sp.</i>          | P                      |                                                                      |
| Turbine HS5 | Chlorophyta   | <i>Ulva sp.</i>                 | P                      |                                                                      |
| Turbine HS5 | Chordata      | Ammodytidae                     | P                      |                                                                      |
| Turbine HS5 | Chordata      | <i>Ciona sp.</i>                | P                      |                                                                      |
| Turbine HS5 | Chordata      | Gadidae                         | P                      |                                                                      |
| Turbine HS5 | Chordata      | <i>Melanogrammus aeglefinus</i> | P                      |                                                                      |
| Turbine HS5 | Cnidaria      | Actiniaria                      | P                      |                                                                      |
| Turbine HS5 | Cnidaria      | <i>Actinothoe sp.</i>           | P                      |                                                                      |
| Turbine HS5 | Cnidaria      | <i>Alcyonium digitatum</i>      | P                      |                                                                      |
| Turbine HS5 | Cnidaria      | <i>Ectopleura larynx</i>        | P                      |                                                                      |
| Turbine HS5 | Cnidaria      | Hydrozoa                        | P                      |                                                                      |
| Turbine HS5 | Cnidaria      | <i>Metridium senile</i>         | P                      |                                                                      |
| Turbine HS5 | Cnidaria      | <i>Sagartia sp.</i>             | P                      |                                                                      |
| Turbine HS5 | Cnidaria      | <i>Tubularia sp.</i>            | P                      |                                                                      |
| Turbine HS5 | Cnidaria      | <i>Urticina sp.</i>             | P                      |                                                                      |
| Turbine HS5 | Echinodermata | <i>Asterias rubens</i>          | 187                    | Potentially underestimated                                           |
| Turbine HS5 | Echinodermata | Asteroidea                      | 940                    | Potentially underestimated                                           |
| Turbine HS5 | Echinodermata | Echinidea                       | 391                    | Potentially underestimated                                           |
| Turbine HS5 | Echinodermata | <i>Echinus sp.</i>              | 17                     |                                                                      |
| Turbine HS5 | Echinodermata | <i>Henricia sp.</i>             | 2                      |                                                                      |
| Turbine HS5 | Mollusca      | <i>Mytilus sp.</i>              | P                      |                                                                      |
| Turbine HS5 | Mollusca      | Nudibranch eggs                 | P                      |                                                                      |
| Turbine HS5 | Mollusca      | Nudibranchia                    | 32                     |                                                                      |
| Turbine HS5 | Phaeophyceae  | <i>Alaria sp.</i>               | P                      |                                                                      |
| Turbine HS5 | Phaeophyceae  | <i>Desmarestia sp.</i>          | P                      |                                                                      |
| Turbine HS5 | Phaeophyceae  | <i>Laminaria sp.</i>            | P                      |                                                                      |
| Turbine HS5 | Phaeophyceae  | Phaeophyceae                    | P                      |                                                                      |
| Turbine HS5 | Porifera      | Porifera                        | P                      |                                                                      |
| Turbine HS5 | Rhodophyta    | Rhodophyta                      | P                      |                                                                      |
